1 **Serine/arginine-rich splicing factor 7 plays oncogenic roles through specific regulation of**  
2 **m<sup>6</sup>A RNA modification**

3  
4 Yixian Cun<sup>1,2,#</sup>, Sanqi An<sup>3,4,5,#</sup>, Haiqing Zheng<sup>1,#</sup>, Jing Lan<sup>6</sup>, Wenfang Chen<sup>3,4</sup>, Wanjun Luo<sup>6</sup>,  
5 Chengguo Yao<sup>4</sup>, Xincheng Li<sup>1,2</sup>, Xiang Huang<sup>3,4</sup>, Xiang Sun<sup>3,4</sup>, Zehong Wu<sup>3,4</sup>, Yameng Hu<sup>1,2</sup>,  
6 Ziwen Li<sup>1,2</sup>, Shuxia Zhang<sup>1,2</sup>, Geyan Wu<sup>7</sup>, Meisongzhu Yang<sup>1,2</sup>, Miaoling Tang<sup>7</sup>, Ruyuan Yu<sup>1,2</sup>,  
7 Xinyi Liao<sup>1,2</sup>, Guicheng Gao<sup>3,4</sup>, Wei Zhao<sup>4</sup>, Jinkai Wang<sup>3,4,8,\*</sup>, Jun Li<sup>1,2,\*</sup>

8  
9 1 Department of Rehabilitation Medicine, Key Laboratory of Liver Disease of Guangdong  
10 Province, The Third Affiliated Hospital, Sun Yat-sen University

11 2 Department of Biochemistry, Zhongshan School of Medicine, Sun Yat-sen University

12 3 Department of Medical Informatics, Zhongshan School of Medicine, Sun Yat-sen  
13 University

14 4 Center for Stem Cell Biology and Tissue Engineering, Key Laboratory for Stem Cells and  
15 Tissue Engineering, Ministry of Education, Sun Yat-sen University, Guangzhou 510080,  
16 China

17 5 Biosafety Level-3 Laboratory, Life Sciences Institute, Guangxi Medical University,  
18 Nanning 530020, China.

19 6 Department of Obstetrics and Gynecology, The First Affiliated Hospital, Sun Yat-sen  
20 University

21 7 State Key Laboratory of Oncology in South China, Cancer Center, Sun Yat-sen University

22 8 RNA Biomedical Institute, Sun Yat-sen Memorial Hospital, Sun Yat-sen University,

23 Guangzhou 510080, China

24 # Equal contribution.

25 \* Corresponding authors.

26 Correspondence to:

27 Jun Li, Ph.D. Key Laboratory of Liver Disease of Guangdong Province, The Third

28 Affiliated Hospital, Sun Yat-sen University, 74 Zhongshan Road II, Guangzhou, Guangdong

29 510080, China; Phone: +86(20)87335828; Fax: +86(20)87335828; E-mail:

30 [lijun37@mail.sysu.edu.cn](mailto:lijun37@mail.sysu.edu.cn)

31 Jinkai Wang, PhD. Zhongshan School of Medicine, Sun Yat-sen University, 74 Zhongshan

32 Road II, Guangzhou, Guangdong 510080, China; Phone: +86(20)87335142; Fax:

33 +86(20)87331209; Email: [wangjk@mail.sysu.edu.cn](mailto:wangjk@mail.sysu.edu.cn)

34

35 Number of figures: 7

36 Number of supplementary figures: 11

37 Number of supplementary tables: 3

38

39 **Abstract**

40 Serine/Arginine-Rich Splicing Factor 7 (SRSF7), which is previously recognized as a  
41 splicing factor, has been revealed to play oncogenic roles in multiple cancers. However, the  
42 mechanisms underlying its oncogenic roles have not been well addressed. Here, based on  
43 N6-methyladenosine (m<sup>6</sup>A) co-methylation network analysis across diverse cell lines, we  
44 found SRSF7 positively correlated with glioblastoma cell-specific m<sup>6</sup>A methylation. We then  
45 proved SRSF7 is a novel m<sup>6</sup>A regulator that specifically facilitates the m<sup>6</sup>A methylation near  
46 its binding sites on the mRNAs involved in cell proliferation and migration through recruiting  
47 methyltransferase complex. Moreover, SRSF7 promotes the proliferation and migration of  
48 glioblastoma cells largely dependent on the m<sup>6</sup>A methyltransferase. The two single-nucleotide  
49 m<sup>6</sup>A sites on *PBK* are regulated by SRSF7 and partially mediate the effects of SRSF7 on  
50 glioblastoma cells through recognition by IGF2BP2. Together, our discovery revealed a novel  
51 role of SRSF7 in regulating m<sup>6</sup>A and timely confirmed the existence and functional  
52 importance of RNA binding protein (RBP) mediated specific regulation of m<sup>6</sup>A.

53 **KEYWORDS:** N6-methyladenosine; SRSF7; specific regulation; glioblastoma

54

55

## 56 **Introduction**

57 Serine/arginine-rich splicing factor 7 (SRSF7, also known as 9G8) belongs to the  
58 serine/arginine (SR) protein family, which contains 7 canonical members (SRSF1-7) [1]. It is  
59 previously known as a splicing factor to regulate alternative splicing as well as a regulator of  
60 alternative polyadenylation [2-5]. SRSF7 is also an adaptor of NXF1, which exports mature  
61 RNAs out of nucleus, and plays important roles in coupling RNA alternative splicing and  
62 polyadenylation to mRNA export [5]. It was reported that hyperphosphorylated SRSF7 binds  
63 to pre-mRNA for splicing and it becomes hypophosphorylated during splicing, the later form  
64 of SRSF7 can bind the NXF1 for the subsequent export of the spliced RNAs [3].

65 The oncogenic roles of SRSF7 have been widely reported. It was discovered as a critical  
66 gene required for cell growth or viability in multiple cancer cell lines based on a genome-wide  
67 CRISPR-Cas9 screening [6]. Aberrantly elevated expression of SRSF7 had been observed in  
68 lung cancer, colon cancer and gastric cancer [7-9]. It was also reported to be highly expressed  
69 in glioblastoma (GBM, grade IV glioma) and associated with poor patient outcome [10].  
70 However, although SRSF7 has been reported to regulate splicing, APA, and mRNA export,  
71 the mechanisms underlying its oncogenic roles have not been well addressed.

72 N<sup>6</sup>-methyladenosine (m<sup>6</sup>A) is a reversible RNA modification prevalent in eukaryotic  
73 messenger RNAs (mRNAs) and long non-coding RNA [11-13]. It plays critical roles in  
74 various biological process, including stem cell differentiation, immune system, learning and  
75 memory, cancer development [14-18]. The m<sup>6</sup>A modification is marked by the m<sup>6</sup>A  
76 methyltransferase (also known as “writers”) complex, which consists of METTL3, METTL14,  
77 WTAP, VIRMA, ZC3H13, RBM15/15B and HAKAI (also known as CBLL1) [19, 20]. m<sup>6</sup>A  
78 can also be removed by demethylases (also known as “erasers”) including FTO and ALKBH5  
79 [21, 22]. The m<sup>6</sup>A-modified RNAs are recognized by a series of readers such as YTH-domain  
80 containing proteins (YTHDF1-3 and YTHDC1-2), in which YTHDF2 facilitates the

81 degradation of methylated RNAs and is important for cell fate transitions [23-26]. IGF2BP1-3  
82 are a different type of readers that can stabilize the methylated RNAs and play oncogenic  
83 roles in multiple types of cancers [27]. In addition, m<sup>6</sup>A can also down-regulate gene  
84 expression through degrading chromosome-associated regulatory RNAs (carRNAs) [28] and  
85 up-regulate gene expression by demethylating H3K9me2 histone modification [29].

86 Unlike global regulation of m<sup>6</sup>A by the methyltransferase complex, selective  
87 modification of m<sup>6</sup>A on specific targets can shape the cell-specific methylome and mediate  
88 specific functions in diverse biological systems. There are different mechanisms that confer  
89 the specificities of m<sup>6</sup>A. Although the components of methyltransferase complex VIRMA and  
90 ZC3H13 mainly affect the m<sup>6</sup>A at stop codon and 3' UTR, their substantial effects on m<sup>6</sup>A  
91 suggest fundamental but limited specificities for m<sup>6</sup>A installation, consistent with that they do  
92 not have RNA binding domain and ZC3H13 works to take the methyltransferase into nucleus  
93 [30, 31]. Since m<sup>6</sup>A occurs co-transcriptionally, m<sup>6</sup>A could be specifically regulated  
94 co-transcriptionally through H3K36me3 and transcription factors. Depletion of H3K36me3  
95 also resulted in global reduction of m<sup>6</sup>A, especially the m<sup>6</sup>A at 3'UTRs and protein-coding  
96 regions, suggesting a fundamental but relatively low specificity in regulation of m<sup>6</sup>A [32]. On  
97 the other hand, transcription factors CEBPZ and SMAD2/3 can recruit the methyltransferase  
98 to methylate the nascent RNAs being transcribed by them and play important roles in acute  
99 myeloid leukemia oncogenesis and stem cells differentiation respectively [33]. The  
100 specificities of transcription factors are conferred by their binding specificities on the  
101 promoters. Therefore, they can mediate highly specific methylation other than global  
102 regulation of m<sup>6</sup>A. However, transcription factors usually bind at the 5' end thus cannot  
103 precisely direct the m<sup>6</sup>A modification at specific loci of the RNAs. In contrast to transcription  
104 factors, which select RNAs other than sites, RBPs have the potential to precisely guide the  
105 methylation at specific sites of RNAs in the similar manner as they regulate alternative

106 splicing [34]. Recently, we developed a co-methylation network based computational  
107 framework and revealed a large number of RBPs act as m<sup>6</sup>A trans-regulators to specifically  
108 regulate m<sup>6</sup>A to form cell-specific m<sup>6</sup>A methylomes [35]. However, firm experimental  
109 validations and profound characterizations are still lacking, and whether these RBPs play  
110 important functional roles through regulating the m<sup>6</sup>A of specific sites are not clear either.

111 In this study, we found SRSF7 specifically regulates the m<sup>6</sup>A on genes involved in cell  
112 proliferation and migration and plays oncogenic roles through recruiting the m<sup>6</sup>A  
113 methyltransferase near its binding sites in GBM cells. Our discovery revealed a novel role of  
114 SRSF7 in regulating m<sup>6</sup>A and timely confirmed the existence and importance of  
115 RBP-mediated specific regulation of m<sup>6</sup>A.

116

117 **Results**

118 **SRSF7 is a potential m<sup>6</sup>A regulator that interacts with m<sup>6</sup>A methyltransferase complex**

119 To elucidate how cells establish cell-specific m<sup>6</sup>A methylomes, we previously developed  
120 a co-methylation network based computational framework to systematically identify the  
121 cell-specific *trans*-regulators of m<sup>6</sup>A [35]. We first identified the RBPs with gene expression  
122 correlated with the m<sup>6</sup>A ratio (level) of specific co-methylation module (a subset of  
123 co-methylated m<sup>6</sup>A peaks) across 25 different cell lines (the detailed information of cell lines  
124 can be found in the supplementary table of [35]). By further investigating the enrichment of  
125 binding targets of the RBPs within their correlated modules based on CLIP-seq data of 157  
126 RBPs and motifs of 89 RBPs, we revealed widespread cell-specific *trans*-regulation of m<sup>6</sup>A  
127 and predicted 32 high-confidence m<sup>6</sup>A regulators [35]. It is of great importance to understand  
128 whether these RBP-mediated specific regulation of m<sup>6</sup>A plays critical functional roles. This  
129 co-methylation network provides the information about cell specificities of different modules,  
130 which give valuable clues for us to speculate the functions of these modules. We realized that  
131 one of the modules (M5) were highly methylated in two glioblastoma (GBM) cell lines  
132 (PBT003 and GSC) (Figure 1A). Coincidentally, although not significant enough to bear  
133 multiple testing correction, the mostly enriched Gene Ontology (GO) terms for the  
134 corresponding genes of this module are glioma and cancer related pathways, suggesting that  
135 the specific methylation of this module may play a role in the development of glioma (Figure  
136 1B). We then tried to dissect the RBPs that direct the specific m<sup>6</sup>A methylation of this glioma  
137 related module. As we have previously determined [35] and shown at the bottom of Figure 1A,  
138 there were 6 RBPs with gene expression significantly correlated with the m<sup>6</sup>A index (the first  
139 component of PCA) of module M5, including 2 positive and 4 negative correlations. We  
140 further analyzed the prognostic relevance of these 6 RBPs in GBM patients from Chinese  
141 Glioma Genome Atlas (CGGA) dataset [36]. We found that the expression of *SRSF7* was

142 most significantly correlated with the survival time of GBM patients (Figure 1C). Highly  
143 expression of *SRSF7* was associated with highly m<sup>6</sup>A methylation of the m<sup>6</sup>A sites in this  
144 module and poor prognosis of the GBM patients (Figure 1D and E). Although the other 5  
145 RBPs may also regulate m<sup>6</sup>A of this module in GBM cells, they cannot really affect the  
146 prognosis of GBM patients, we therefore focused on *SRSF7* to investigate whether and how it  
147 plays important role in GBM through specific regulation of m<sup>6</sup>A.

148 To test whether *SRSF7* is a genuine m<sup>6</sup>A regulator that facilitates the installation of m<sup>6</sup>A  
149 at specific m<sup>6</sup>A sites, we first examined whether *SRSF7* can interact with the core m<sup>6</sup>A  
150 methyltransferase complex composed of METTL3, METTL14, and WTAP in a GBM cell line  
151 U87MG. Co-immunoprecipitation (Co-IP) assays revealed that Flag-tagged *SRSF7* could pull  
152 down the endogenous METTL3, METTL14, and WTAP independent of RNA (Figure 1F and  
153 G). Reciprocally, both Flag-tagged METTL3 and WTAP could also pull down endogenous  
154 *SRSF7* in an RNA independent manner respectively in U87MG cells (Figure 1H and I).  
155 Similar results were observed in 293T cells, suggesting the interaction between *SRSF7* and  
156 methyltransferase complex is a universal mechanism (Figure S1A). In addition, we performed  
157 co-IP using truncated *SRSF7* with RRM (RNA recognition motif) domain and RS  
158 (arginine/serine) domain deleted respectively in U87MG cells and found deletion of RRM  
159 domain other than RS domain could disrupt the interaction with METTL3, METTL14, and  
160 WTAP, indicating that *SRSF7* interacts with the methyltransferase complex through its RRM  
161 domain (Figure 1J and Figure S1B).

162 We then used 3D-SIM super-resolution microscopy to test the protein colocalization  
163 between *SRSF7* and m<sup>6</sup>A methyltransferase complex in U87MG cells. We found a portion of  
164 *SRSF7* proteins were colocalized with portions of METTL3, METTL14, and WTAP in the  
165 nuclear respectively, implying that at least a part of *SRSF7* proteins can specifically regulate



166 m<sup>6</sup>A (Figure 1K). The above results suggest that SRSF7 may be able to regulate m<sup>6</sup>A through  
167 recruiting the m<sup>6</sup>A methyltransferase complex.

### 168 **SRSF7 specifically facilitates the m<sup>6</sup>A modification near its binding sites**

169 To further investigate whether SRSF7 regulates m<sup>6</sup>A modification, we knocked down  
170 SRSF7 and performed m<sup>6</sup>A-seq to examine the m<sup>6</sup>A alteration due to *SRSF7* depletion in  
171 U87MG cells. The typical m<sup>6</sup>A motif was enriched in the m<sup>6</sup>A peaks of both knockdown and  
172 control cells (Figure S2A). As shown in Figure S2B, the m<sup>6</sup>A peaks were enriched near the  
173 stop codons in both knockdown and control cells, which is consistent with previous studies  
174 [11, 12]. In contrast to the RBPs in the m<sup>6</sup>A methyltransferase complex, which usually cause  
175 massive loss of m<sup>6</sup>A upon depletion [20], depletion of *SRSF7* did not alter the distribution  
176 (Figure S2B) and overall peak intensities of the m<sup>6</sup>A peaks (Figure S2C), suggesting that  
177 SRSF7 may be a different type of m<sup>6</sup>A regulator that regulates a small number of highly  
178 specific m<sup>6</sup>A sites in U87MG cells.

179 We then determined the differentially methylated m<sup>6</sup>A sites between *SRSF7* knockdown  
180 and control to understand the specific sites regulated by SRSF7. After *SRSF7* knockdown,  
181 3334 m<sup>6</sup>A peaks in 2440 genes were down-regulated; in contrast, only 2447 peaks in 1850  
182 genes were up-regulated (Figure 2A and Figure S2D). Gene ontology (GO) analysis and  
183 KEGG analysis showed that these differentially methylated genes were enriched in terms  
184 including cell division, cell migration, cell proliferation, and pathway in cancer (Figure S2E  
185 and F).

186 To further confirm that SRSF7 regulates the m<sup>6</sup>A sites through binding near the m<sup>6</sup>A  
187 sites, we performed iCLIP-seq [37] for SRSF7 to identify the transcriptome-wide binding  
188 sites of SRSF7 in U87MG cells. We identified 40476 iCLIP-seq peaks using CTK tool kit [38]  
189 (Table S1). The enriched motifs were similar as the previously reported motif of SRSF7  
190 (GAYGAY) [39], suggesting the high reliability of our iCLIP-seq data (Figure 2B).

191 Interestingly, the m<sup>6</sup>A motif were also enriched in the SRSF7 iCLIP-seq peaks (Figure 2B),  
192 suggesting the co-localization of SRSF7 with m<sup>6</sup>A sites. We found only 7.9% and 3.1% of the  
193 peaks were in introns and noncoding RNAs respectively; in contrast, 66.9% of the peaks were  
194 in protein-coding regions, which are similar as the distribution of m<sup>6</sup>A (Figure S2G). However,  
195 the peaks were more enriched at the 5' end of the protein-coding regions, which was distinct  
196 from m<sup>6</sup>A peaks; while the peaks colocalized with m<sup>6</sup>A peaks were enriched at both 5' end  
197 and 3' end, further suggesting that SRSF7 specifically regulates only a portion of m<sup>6</sup>A peaks  
198 other than global regulation (Figure 2C and Figure S2H).

199 We were then interested in whether SRSF7 binding were related to the m<sup>6</sup>A alteration  
200 due to SRSF7 depletion. We found that although the overall m<sup>6</sup>A ratios of all m<sup>6</sup>A peaks do  
201 not change upon SRSF7 knockdown, the m<sup>6</sup>A ratios of m<sup>6</sup>A peaks colocalized with SRSF7  
202 iCLIP-seq peaks were significantly down-regulated upon SRSF7 knockdown, suggesting  
203 SRSF7 can only promote the m<sup>6</sup>A near its binding sites (Figure 2D). As compared with the  
204 m<sup>6</sup>A peaks unbound by SRSF7, the m<sup>6</sup>A ratio of SRSF7 bound m<sup>6</sup>A peaks were significantly  
205 down-regulated due to *SRSF7* knockdown, indicating that SRSF7 specifically facilitates the  
206 m<sup>6</sup>A near its binding sites (Figure 2E). As shown in Figure 2F, we also revealed significant  
207 enrichment of SRSF7 iCLIP-seq peaks in (or overlap with) the down-regulated m<sup>6</sup>A peaks  
208 upon *SRSF7* knockdown. In addition, the SRSF7 binding sites were significantly enriched in  
209 m<sup>6</sup>A peaks down-regulated upon *SRSF7* knockdown as compared with the up-regulated and  
210 unchanged m<sup>6</sup>A peaks, further supporting that SRSF7 binding results in locally enhanced  
211 other than decreased m<sup>6</sup>A methylation (Figure 2G). On the other hand, although the module  
212 was constructed from diverse cell lines, the SRSF7 binding sites in U87MG cells were still  
213 marginally significantly enriched ( $P = 0.03$ ) in the orange module, which is a larger module  
214 merged by M5 and other 4 correlated modules, as compared with other modules. The m<sup>6</sup>A  
215 peaks in the orange module were also significantly down-regulated upon *SRSF7* knockdown

216 as compared with the m<sup>6</sup>A peaks in other modules, suggesting SRSF7 promotes the m<sup>6</sup>A of  
217 this module (Figure S2I).

### 218 **SRSF7 significantly regulates gene expression through regulating m<sup>6</sup>A**

219 We then studied whether SRSF7 affects the gene expression through regulating m<sup>6</sup>A in  
220 U87MG cell. The expression of 1012 and 1275 genes were up-regulated and down-regulated  
221 respectively due to *SRSF7* knockdown (Figure S3A). GO enrichment analyses found that the  
222 down-regulated genes were enriched in terms such as cell division, cell migration, cell cycle,  
223 consistent with the GO terms enriched in differentially methylated genes (Figure S3B).  
224 However, the up-regulated genes were enriched in terms macroautophagy, vesicle docking,  
225 protein transport, which were quite different from the GO terms enriched in differentially  
226 methylated genes (Figure S3C). Gene set enrichment analysis (GSEA) also support the gene  
227 expression changes were involved in cell division, cell cytoskeleton and cell cycle (Figure  
228 S3D-F). We found both the up-regulated genes and down-regulated genes significantly  
229 enriched for m<sup>6</sup>A modified genes as compared with the genes without expression change ( $P =$   
230  $4.8 \times 10^{-14}$  for up-regulated genes;  $P = 3.2 \times 10^{-20}$  for down-regulated genes; two-tailed  
231 Chi-square test; Figure 2H). This result suggests SRSF7 can both up-regulate and  
232 down-regulate gene expression through m<sup>6</sup>A, consistent with the previous reports that m<sup>6</sup>A  
233 has dual effects on gene expression depends on how these m<sup>6</sup>A sites are recognized by diverse  
234 m<sup>6</sup>A readers [23, 27-29]. To further clarify the direct effects of SRSF7, we investigated the  
235 effects of SRSF7 binding on gene expression through regulating m<sup>6</sup>A. As shown in Figure 2I,  
236 the genes with SRSF7 targeted m<sup>6</sup>A peaks are overall significantly down-regulated as  
237 compared with non-modified genes upon SRSF7 knockdown ( $P = 3.6 \times 10^{-11}$ , two-tailed  
238 Wilcoxon test, Figure 2I).

### 239 **Artificially tethering SRSF7 on RNA directs *de novo* m<sup>6</sup>A methylation through** 240 **recruiting METTL3**

241 We then performed a tethering assay to test whether direct tethering of SRSF7 protein  
242 was sufficient to dictate the m<sup>6</sup>A modification nearby in U87MG cells. For this purpose, we  
243 respectively fused the full-length CDS region SRSF7 and METTL3 with  $\lambda$  peptide, which can  
244 specifically recognize BOX B RNA [40]. We utilized a previously established F-luc-5BoxB  
245 luciferase reporter, which has five Box B sequence in the 3'UTR and a m<sup>6</sup>A motif (GGACU)  
246 73 bp upstream of the stop codon (Figure 2J) [30]. We found tethering SRSF7 and METTL3  
247 could both significantly up-regulate the modification of m<sup>6</sup>A site on the reporter to the similar  
248 degree using SELECT method [41], indicating that SRSF7 can similarly dictate the  
249 methylation of nearby m<sup>6</sup>A site as METTL3 (Figure 2K). A disruptive synonymous point  
250 mutation in the m<sup>6</sup>A motif, which changes the GGACU to GGAUU, completely disrupted the  
251 effects of m<sup>6</sup>A change by tethering SRSF7 and METTL3 respectively, indicating the high  
252 reliability of the tethering assay (Figure 2K). In addition, we found that binding of METTL3  
253 on F-luc RNA was significantly up-regulated when tethered SRSF7 to F-luc-5BoxB,  
254 indicating that SRSF7 promotes the installation of m<sup>6</sup>A through recruiting METTL3 (Figure  
255 2L).

### 256 **SRSF7 specifically targets and facilitates the methylation of m<sup>6</sup>A on genes involved in** 257 **cell proliferation and migration**

258 Since SRSF7 iCLIP-seq peaks are significantly enriched in down-regulated m<sup>6</sup>A peaks  
259 upon SRSF7 knockdown (Figure 2G), to further dissect the specific m<sup>6</sup>A targets that directly  
260 regulated by SRSF7 binding, we intersected the 40476 SRSF7 iCLIP-seq peaks and 3334  
261 down-regulated m<sup>6</sup>A peaks upon SRSF7 knockdown to obtained 911 SRSF7 directly  
262 regulated m<sup>6</sup>A peaks in 760 genes (Figure 3A and Table S2). As shown in Figure 3B, the  
263 distribution of SRSF7 directly regulated m<sup>6</sup>A peaks was still similar as the canonical  
264 distribution of m<sup>6</sup>A peaks, suggesting SRSF7 are not accounting for the formation of the  
265 canonical topology of m<sup>6</sup>A like VIRMA [30]. Gene Ontology analysis revealed that the genes

266 with SRSF7 directly regulated m<sup>6</sup>A peaks were mainly involved in cell migration, cell  
267 adhesion, cell proliferation, glioma, cell cycle and pathway in cancer (Figure 3C and Figure  
268 S4A). In contrast, the genes with SRSF7 iCLIP-seq peaks not colocalize with m<sup>6</sup>A peaks were  
269 enriched in totally different terms which were not directly related to cell proliferation and  
270 migration (Figure S4B). The results suggest that the elevated expression of SRSF7 in GBM  
271 patients may involve in migration and proliferation of the cancer cells through regulating the  
272 m<sup>6</sup>A of corresponding genes.

273 To further validate the 911 SRSF7 directly regulated m<sup>6</sup>A peaks, we then selected 3 m<sup>6</sup>A  
274 peaks in 3 tumorigenic genes involved in migration or proliferation of GBM. All of the 3  
275 peaks on *PBK*, *MCM4*, and *ROBO1* were successfully validated (the signal tracks of these  
276 m<sup>6</sup>A peaks were demonstrated in Figure 3D-E and Figure S4C). We detected 4  
277 single-nucleotide m<sup>6</sup>A sites in the 3 m<sup>6</sup>A peaks according to the public available miCLIP-seq  
278 data [42, 43]. The methylation levels of the 4 m<sup>6</sup>A sites in the 3 m<sup>6</sup>A peaks (*PBK* at 1041 and  
279 1071, *MCM4* at 1515, *ROBO1* at 672) were significantly decreased upon *SRSF7* knockdown  
280 and *METTL3* knockdown respectively based on SELECT method [41], indicating SRSF7 has  
281 similar effects of promoting m<sup>6</sup>A as METTL3 on these selected m<sup>6</sup>A sites (Figure 3F-I). We  
282 also found that the binding efficiencies of METTL3, METTL14, and WTAP on the RNAs of  
283 these 3 genes were significantly reduced upon *SRSF7* knockdown based on RIP-qPCR  
284 (Figure 3J-L). Collectively, these results show that SRSF7 promotes m<sup>6</sup>A modification on  
285 tumorigenic genes through recruiting METTL3.

### 286 **SRSF7 promotes proliferation and migration of glioblastoma cells partially dependent** 287 **on METTL3**

288 Since SRSF7 specifically regulates the m<sup>6</sup>A of tumorigenic genes in GBM cells, we  
289 therefore wanted to confirm whether it plays important roles in GBM. We found the  
290 expression of *SRSF7* was highly elevated in glioma specimens, especially in glioblastoma

291 (grade IV) tissues according to CGGA data (Figure 4A), which was confirmed by  
292 Immunohistochemistry (IHC) in human glioma tissues (Figure 4B) and consistent with  
293 previous report [10]. To further confirm this finding, we tested the expression of SRSF7 in 11  
294 GBM cell lines as well as normal human astrocytes (NHAs). We found the mRNA expression  
295 of SRSF7 was significantly elevated in most of the glioma cell lines and the protein level was  
296 highly expressed in all glioma cell lines as compared with NHA (Figure 4C and D).

297 Because the genes with SRSF7 directly regulated m<sup>6</sup>A peaks were enriched in cell  
298 proliferation and migration related GO terms (Figure 3C), we knocked down *SRSF7* in  
299 U87MG cells and LN229 cells and performed EdU, colony formation, and transwell assays to  
300 test the effects of SRSF7 on cell proliferation and migration. We found overexpression of  
301 *SRSF7* prompted the cell proliferation and migration of these two cell lines (Figure 4E-F and  
302 Figure S5A). Consistently, depletion of *SRSF7* significantly impaired the proliferation and  
303 migration in U87MG and LN229 cell lines (Figure 4G-H and Figure S5B-D) and  
304 overexpression of *SRSF7* can rescue the inhibition of proliferation and migration caused by  
305 *SRSF7* knockdown (Figure S5E-G), which were similar as the effects of *METTL3* knockdown  
306 in the same cell lines [44, 45]. Although *METTL3* has been reported to regulate the stemness  
307 of GBM cells [44-47], the genes with SRSF7 directly regulated m<sup>6</sup>A peaks have no  
308 enrichment of stemness related terms (Figure 3C). Here, we found neither knockdown or  
309 overexpression of *SRSF7* could affect the neurosphere formation in U87MG cells, which  
310 suggesting that SRSF7 plays more specific roles in GBM than *METTL3* through specific  
311 regulation of m<sup>6</sup>A (Figure S5H). To investigate the oncogenic role of SRSF7 in GBM cells *in*  
312 *vivo*, we utilized an intracranial xenograft tumor model, in which we transplanted *SRSF7*  
313 depleted as well as control U87MG stable cell lines into the nude mice. Consistent with the *in*  
314 *vitro* findings, *SRSF7* knockdown significantly inhibited the growth of glioma xenografts  
315 (Figure 4I-K). We further confirmed that SRSF7 cannot regulate the gene or protein

316 expression of the core methyltransferase complex (Figure 5A and Figure S6A-E), and  
317 METTL3 or WTAP cannot regulate the expression of SRSF7 either in U87MG or LN229  
318 cells (Figure S6F-G). In addition, SRSF7 knockdown did not change the nuclear speckle  
319 localization of METTL3, METTL14, or WTAP (Figure S6H-J). The above results indicate  
320 that SRSF7 promotes the proliferation and migration, which are usually related to oncogenic  
321 roles, of GBM cells.

322 It was reported that METTL3 plays oncogenic roles in GBM [48-51], we were therefore  
323 interested in whether SRSF7 plays oncogenic roles through specifically guiding METTL3 to  
324 oncogenic genes. We found *METTL3* knockdown largely, although not completely, disrupted  
325 the effects of *SRSF7* overexpression on promoting the migration (Figure 5A-C) and  
326 proliferation (Figure 5D-F) of U87MG and LN229 cell, indicating that SRSF7 regulates  
327 migration and proliferation partially depends on METTL3. The above results are consistent  
328 with our model that SRSF7 specifically guides METTL3 to the specific oncogenes and  
329 METTL3 takes in charge to install the m<sup>6</sup>A on these RNAs.

### 330 **SRSF7 promotes the proliferation and migration of GBM cells partially through the** 331 **m<sup>6</sup>A on *PBK* mRNA**

332 We were then interested in the downstream targets of SRSF7 that mediated the  
333 proliferation and migration changes of GBM cells *via* m<sup>6</sup>A. Out of the 760 genes with SRSF7  
334 directly regulated m<sup>6</sup>A peaks, *PBK* is the most significantly down-regulated gene upon *SRSF7*  
335 knockdown. Meanwhile, as shown in Figure 3D and Figure 3F-G, we have confirmed that  
336 SRSF7 knockdown significantly reduced the m<sup>6</sup>A of two m<sup>6</sup>A sites on PBK (A1041 and  
337 A1071). *PBK* is also a serine/threonine protein kinase which is aberrantly overexpressed in  
338 various cancers and plays important roles in promoting the proliferation and migration of  
339 multiple cancers including glioma [52-56]. Based on the CGGA dataset, *PBK* is significantly  
340 higher expressed in WHO IV of glioma patients as compared with WHO II and WHO III, the

341 highly expression of *PBK* is significantly associated with poor prognosis in GBM (Figure  
342 S7A-B). Furthermore, the gene expression of *PBK* is positively correlated with *SRSF7* and  
343 *METTL3* based on CGGA dataset, suggesting a regulatory role between them (**Figure 6A** and  
344 Figure S7C). We found that overexpression of *PBK* could partially rescue the *SRSF7*  
345 knockdown induced inhibition of proliferation and migration of U87MG and LN229 cells,  
346 indicating that *PBK* is an important downstream target of *SRSF7* and partially mediated the  
347 effects of *SRSF7* on promoting the proliferation and migration of GBM cells (Figure 6B-C  
348 and Figure S7D-E). We were therefore interested in whether and how the expression of *PBK*  
349 was regulated by *SRSF7*.

350 First, we tested whether *SRSF7* played a regulator role on *PBK* through regulating its  
351 m<sup>6</sup>A. We found that *SRSF7* knockdown significantly decreased the mRNA and protein  
352 expression of *PBK* in U87MG cells (Figure 6D and E). Overexpression of *SRSF7*  
353 significantly up-regulated the gene expression of *PBK*, and *METTL3* knockdown largely  
354 disrupted the effect of *SRSF7* on the expression of *PBK* in U87MG cells, indicating that  
355 *SRSF7* regulates *PBK* depends on *METTL3* (Figure 6F and Figure S7F-G).

356 We then asked how the m<sup>6</sup>A of *PBK* affects its expression. We found *SRSF7* knockdown  
357 also significantly promoted the degradation of *PBK* mRNAs, suggesting that *SRSF7* increase  
358 *PBK* gene expression through promoting the stability of *PBK* mRNAs (Figure 6G). To further  
359 confirm this regulation of RNA stability depends on the m<sup>6</sup>A of *PBK*, we introduced two  
360 synonymous A to G mutations to disrupt the two m<sup>6</sup>A sites on *PBK* (Figure 6H). We found  
361 the overexpression of *PBK* mutants exhibited significantly lower expression and lower  
362 stability of *PBK* mRNA than overexpression of wild type *PBK*, suggesting the modification of  
363 the two m<sup>6</sup>A sites on *PBK* are essential for the stability of *PBK* mRNA (Figure 6I and J).  
364 Because m<sup>6</sup>A readers IGF2BP1-3 have been reported to promote the stabilities of mRNAs  
365 and play oncogenic roles in multiple cancers [27]. We then tested whether IGF2BP2, a gene



366 significantly up-regulated in GBM, could affect the RNA stability of *PBK* through binding the  
367 m<sup>6</sup>A sites. We found knockdown of *IGF2BP2* decreased the expression and stability of  
368 endogenous *PBK* mRNA (Figure 6K and Figure S7H), which is consistent with the finding  
369 that the gene expression of *IGF2BP2* is positively correlated with *PBK* based on CGGA  
370 dataset (Figure S7I). Knockdown of *IGF2BP2* could also significantly decrease the stability  
371 of the exogenous overexpressed wild type *PBK* other than *PBK* mutants with the two m<sup>6</sup>A  
372 sites disrupted, suggesting that the regulatory roles of *IGF2BP2* on the stability of *PBK*  
373 depends on the two m<sup>6</sup>A sites (Figure 6L).

#### 374 **SRSF7 regulates m<sup>6</sup>A independent of alternative splicing and polyadenylation**

375       Since *SRSF7* was previously recognized as a splicing factor [2-4], to test whether *SRSF7*  
376 can regulate alternative splicing in U87MG cells, we analyzed the differential alternative  
377 splicing of input RNAs between *SRSF7* knockdown and control using rMATS [57]. We found  
378 1344 differentially spliced events, including 734 skipped exons (SE), 222 retained introns  
379 (RI), 129 alternative spliced 5' splice sites (A5SS), 173 alternative spliced 3' splice sites  
380 (A3SS), and 86 mutually exclusive exons (MXE). Of note, none of *PBK*, *MCM4*, or *ROBO1*  
381 has alternative splicing change upon *SRSF7* knockdown. We then used rMAPS2 [58] to study  
382 the enrichment of *SRSF7* iCLIP-seq peaks near the splice sites of differentially spliced SE  
383 events, which are the most abundant type for reliable analyses. We found the iCLIP-seq  
384 targets of *SRSF7* were significantly enriched in the alternative exons of the differentially  
385 spliced events, suggesting *SRSF7* binding directs the splicing changes (Figure 7A). GO  
386 analysis revealed that the genes with significant splicing changes were also enriched in  
387 functional terms “Cell-cell adhesion”, “Cell cycle”, suggesting *SRSF7* can also regulate cell  
388 proliferation and migration through alternative splicing (Figure 7B). For the 760 genes with  
389 *SRSF7* directly regulated m<sup>6</sup>A, only 102 (13.4%) of them had significant splicing changes  
390 upon *SRSF7* knockdown (Figure 7C), which represented a non-significant overlap that could

391 easily occur by random chance ( $P = 0.3$ , two tailed Chi-square test). For the 129 m<sup>6</sup>A peaks in  
392 the 102 genes, only 36 peaks in 28 genes were localized within the local regions of  
393 differentially splicing events spanning between upstream exons to downstream exons, of  
394 which only 7 m<sup>6</sup>A peaks were located within the alternative exons or regions. The above  
395 results indicate that SRSF7 regulates m<sup>6</sup>A and alternative splicing independently through  
396 distinct binding sites, consistent with our observation that only a part of SRSF7 proteins  
397 co-localize with METTL3 and only a part of SRSF7 binding sites can regulate m<sup>6</sup>A.

398       Since SRSF7 was also reported to regulate alternative polyadenylation (APA) of RNAs  
399 [5], we also analyzed the differential APAs of input RNAs between *SRSF7* knockdown and  
400 control in U87MG cells using DaPars [59]. We only found 14 APA events were significantly  
401 changed (Figure 7D), and none of the SRSF7 directly regulated m<sup>6</sup>A peaks was located within  
402 the 14 APA regions regulated by SRSF7, suggesting noninterference between SRSF7  
403 regulated m<sup>6</sup>A and APA.

#### 404 **Discussion**

405       m<sup>6</sup>A has been reported to play important roles in diverse systems through different  
406 targets, there are widespread m<sup>6</sup>A sites on most of the genes with diverse functions, it is very  
407 important for cells to dynamically coordinate the methylation of different genes to fulfil  
408 specific functions. In this study, we found SRSF7 specifically regulate the m<sup>6</sup>A on genes  
409 involved in cell proliferation and migration, it demonstrated an important role of  
410 RBP-mediated specific regulation of m<sup>6</sup>A in co-regulating and coordinating a batch of related  
411 m<sup>6</sup>A sites in order to modulate the specific functions in cells. These diverse specific m<sup>6</sup>A  
412 regulators provide a versatile toolkit for cells to deal with various inner and outer stimulates.  
413 On the other hand, widespread involvement of RBPs in regulating m<sup>6</sup>A suggests that the m<sup>6</sup>A  
414 signaling pathways are deeply involved in the regulatory network of genes. Therefore, other  
415 signaling or regulatory pathways can modulate the m<sup>6</sup>A through regulating the RBPs in order

416 to fulfil the downstream functions. It is very possible that more and more important functional  
417 roles of RBP-mediated specific regulation of m<sup>6</sup>A will be revealed in the future.

418 SRSF7 is an adaptor of NXF1, which exports mature RNAs out of nucleus, and plays  
419 important roles in coupling RNA alternative splicing and polyadenylation to mRNA export  
420 [5]. We revealed a novel role for SRSF7 as a regulator of m<sup>6</sup>A methylation via recruiting  
421 METTL3. It is very possible that SRSF7 may also couple m<sup>6</sup>A methylation to mRNA export,  
422 in this way the specific RNAs must be methylated before export. RBM15, a component of  
423 methyltransferase complex, is also an adaptor of NXF1 [60], furthering suggesting that  
424 methylation and export could be linked by a series of m<sup>6</sup>A regulators with RNA binding  
425 specificities.

426 Interaction of SRSF7 with the nucleic m<sup>6</sup>A reader YTHDC1 has been reported by  
427 different groups [61, 62]. Xiao *et al* found SRSF7 does not mediate the splicing change  
428 regulated by YTHDC1 [61]. While Kasowitz *et al* proposed that YTHDC1 regulates  
429 alternative polyadenylation through recruiting SRSF7 [62]. The interactions of SRSF7 with  
430 both writers and readers of m<sup>6</sup>A suggest that SRSF7 may also work to coordinate the  
431 feedback between writing and reading of m<sup>6</sup>A. On the other hand, although the association  
432 between m<sup>6</sup>A and alternative polyadenylation has been reported in multiple studies, the  
433 mechanism is not clear yet [30, 62-64]. Our finding that SRSF7 specifically regulates m<sup>6</sup>A  
434 may provide a novel potential mechanism that link m<sup>6</sup>A and alternative polyadenylation by  
435 SRSF7.

436 We found SRSF7 knockdown did not affect the overall peak intensities of all m<sup>6</sup>A peaks,  
437 but the overall peak intensities of SRSF7 targeted m<sup>6</sup>A peaks were significantly  
438 down-regulated upon SRSF7 knockdown. The indicated fact that SRSF7 only regulates a  
439 small portion of m<sup>6</sup>A sites may be a general feature of all specific regulators of m<sup>6</sup>A, it  
440 represents the advantage of using specific m<sup>6</sup>A regulators for cells that require precise

441 regulation of a small portion of m<sup>6</sup>A targets. As we have previously proposed, the specific  
442 regulators of m<sup>6</sup>A may work in a similar way as splicing factors [35, 65], which usually do  
443 not affect the global splicing levels but a small portion of cell-specific splicing events [34].  
444 On the other hand, although we have proved that only down-regulated m<sup>6</sup>A peaks upon  
445 *SRSF7* knockdown enriched for *SRSF7* binding sites, we cannot rule out there are also  
446 indirect effects of *SRSF7* knockdown that up-regulates m<sup>6</sup>A, which may counteract the direct  
447 effects of *SRSF7*. We found significant ( $P < 1 \times 10^{-4}$ ) enrichment of 8 motifs in the  
448 up-regulated m<sup>6</sup>A peaks using all m<sup>6</sup>A peaks as background, suggesting that other specific  
449 regulators may recruit methyltransferase locally as indirect effects of *SRSF7* knockdown  
450 (Figure S8A).

451 To understand why only a small part of *SRSF7* binding peaks can affect m<sup>6</sup>A  
452 methylation, we performed motif enrichment analysis for the *SRSF7* iCLIP-seq peaks that  
453 overlapped with the 911 *SRSF7* directly regulated m<sup>6</sup>A peaks using all *SRSF7* iCLIP-seq  
454 peaks as background. As shown in Supplementary Figure S8B, there are 10 motifs  
455 significantly ( $P < 1 \times 10^{-4}$ ) enriched in the *SRSF7* iCLIP-seq peaks that affect m<sup>6</sup>A. The most  
456 significantly enriched motifs are m<sup>6</sup>A motifs, suggesting that the existence of m<sup>6</sup>A motif near  
457 *SRSF7* binding sites are necessary for *SRSF7* to promote the m<sup>6</sup>A methylation. This is  
458 consistent with our finding that tethering *SRSF7* promotes the m<sup>6</sup>A methylation of a nearby  
459 m<sup>6</sup>A motif but not the disruptive m<sup>6</sup>A motif with mutation right beside the m<sup>6</sup>A site (Figure  
460 2K). The enrichments of non-m<sup>6</sup>A motifs suggesting that the regulatory role of *SRSF7* on  
461 m<sup>6</sup>A may be modulated by other factors colocalized with *SRSF7* (Supplementary Figure S8B).  
462 On the other hand, it was reported that protein modifications of *SRSF7* are important for  
463 *SRSF7* to play different roles on RNA metabolisms. For example, phosphorylated *SRSF7*  
464 affects RNA splicing, while dephosphorylated *SRSF7* promotes nuclear exportation of RNAs  
465 [3]. In this study, we found *SRSF7* regulated alternative splicing events and alternative

466 polyadenylation events occur independently with m<sup>6</sup>A peaks (Figure 7A-D), suggesting that  
467 there is also a comparable fraction of SRSF7 binding sites required for proper alternative  
468 splicing and alternative polyadenylation other than m<sup>6</sup>A in GBM cells, probably more sites  
469 take charge for nuclear export of RNAs. In addition, not all RBP binding sites reported by  
470 CLIP-seq are functional because the binding may not be strong enough. Considering that  
471 there are also a small portion of SRSF7 binding sites that can affect alternative splicing, the  
472 number of m<sup>6</sup>A regulating SRSF7 binding sites look reasonable for specific regulators that do  
473 not affect the nuclear speckle localization of methyltransferase (Figure S6H-I).

474 m<sup>6</sup>A has been reported to play important roles in cancer development [48-51]. Global  
475 disruption of m<sup>6</sup>A by METTL3 depletion has been found to affect tumor growth, invasion,  
476 migration, metastasis, chemoresistance, and *et al* in a variety of cancers via regulating the  
477 m<sup>6</sup>A of diverse downstream genes [15, 17, 66]. Glioblastoma (GBM, WHO grade IV glioma)  
478 is the most prevalent and malignant primary brain tumor, and characterized by rapid tumor  
479 growth, highly diffuse infiltration, chemoresistance, as well as poor prognosis, with the  
480 median survival of GBM patients less than 15 months after diagnosis [67]. Cui *et al* reported  
481 that METTL3 functions as a tumor suppressor to inhibit the growth and self-renewal of  
482 glioblastoma stem cell [47]. Consistently, Zhang *et al* reported demethylase ALKBH5 is  
483 essential for glioblastoma stem cell self-renewal and proliferation [46]. Based on different  
484 GBM cell lines used by Cui *et al* and Zhang *et al*, another two groups reported that METTL3  
485 is highly expressed in GBM cells and plays oncogenic roles in promoting the growth,  
486 migration, invasion, and radiotherapy resistance in GBM cells [44, 45]. These diverse and  
487 somewhat conflicting roles of m<sup>6</sup>A in GBM are mediated by different m<sup>6</sup>A targets, suggesting  
488 that the roles of m<sup>6</sup>A in GBM depends on the contexts and specific downstream m<sup>6</sup>A targets.  
489 Since different m<sup>6</sup>A sites may direct different roles of m<sup>6</sup>A on GBM, targeting more specific  
490 m<sup>6</sup>A sites may be a promising direction in GBM therapy. It is possible that the abnormal

491 expression of *trans* regulators of m<sup>6</sup>A that guide the deposition of METTL3 on highly specific  
492 downstream targets may cause dysregulation of specific m<sup>6</sup>A sites with more converged  
493 functions in GBM. On the other hand, the gene expression of SRSF7 and METTL3 are  
494 positively correlated in majority of cancer types of The Cancer Genome Atlas (TCGA)  
495 (Figure S9), and both *SRSF7* and *PBK* showed significantly higher gene expression in  
496 multiple cancer types (Figure S10-11), suggesting that the regulatory role of SRSF7 on m<sup>6</sup>A  
497 may also contribute the tumorigenicities of other cancers. Elucidating the m<sup>6</sup>A regulators that  
498 underlie this process may provide diverse drug targets with much fewer side effects for a  
499 variety of cancers.

500

501 **Materials and methods**

502 **Cell culture and reagents**

503 HEK293T cells, the Normal human astrocytes (NHA, ScienCell) and Glioma cell lines,  
504 including U87MG, LN229, A172, LN18, LN428, LN443, SNB19, T98G, U118MG, U251,  
505 and U138MG were cultured in Gibco DMEM containing 10% FBS at 37°C in a humidified  
506 incubator with 5% CO<sub>2</sub>. All cells used in this study were confirmed mycoplasma-free.

507 **Tissue specimens**

508 Both paraffin-embedded normal brain and glioma specimens were collected from glioma  
509 patients diagnosed from 2001 to 2006 at the First Affiliated Hospital of Sun Yat-sen  
510 University. Written informed consent and approval was obtained from the Institutional  
511 Research Ethics Committee of Sun Yat-sen University.

512 **Plasmids, siRNAs and stable cell line construction**

513 For overexpression, the full-length coding region of *SRSF7* was subcloned into the pSin-EF2  
514 lentiviral system. For gene silencing, short-hairpin RNA (shRNA) oligos were constructed  
515 into pLKO.1 vector. The psin-EF2-SRSF7 and pLKO.1-shSRSF7#1/2 plasmids were  
516 transfected into HEK293T cells with packing plasmids pMD2.G and psPAX2 to produce  
517 lentiviruses. Glioma cell lines were infected with these lentiviruses for 48h respectively, and  
518 later treated with puromycin for 7 days at a concentration of 0.5 µg/ml to construct stable cell  
519 lines. In addition, for the plasmids used in co-IP, the Flag-tagged full-length coding regions of  
520 *SRSF7*, *METTL3*, and *WTAP* were subcloned into pcDNA3.1 vector respectively and were  
521 transfected into U87MG cells with Lipofectamine 3000 (Invitrogen). For rescue assays, the  
522 full-length coding region of *SRSF7* with synonymous point mutations (mutate  
523 AGAACTGTATGGATTGCGAGA to AGAACCGTGTGGATCGCGCGC) was inserted into  
524 pLVX-IRES-neo plasmid to avoid being targeting by shRNAs of *SRSF7*. The PBK

525 overexpression plasmid was constructed by inserting the full-length coding region of the  
526 major isoform of PBK (RefSeq ID: NM\_018492) into pCDH-CMV-MCS-EF1-Puro vector.  
527 The two synonymous point mutations, which do not change amino acids, were introduced at  
528 m<sup>6</sup>A sites 1041 and 1071 by mutating A to G respectively.

529 Moreover, three *SRSF7* siRNAs, two *METTL3* siRNAs, two *WTAP* siRNAs, and two  
530 *IGF2BP2* siRNAs were purchased from RiboBio, China. All the sequences of siRNA oligos,  
531 PCR primers, and shRNA oligos are listed in Table S3.

### 532 **Co-immunoprecipitation (Co-IP) and Western blot**

533 Cells were lysed with 1 × E1A lysis buffer (250 mM NaCl, 50 mM HEPES, 0.1% NP-40, 5  
534 mM EDTA, PH adjusted at 7.5), which supplemented with 1mM PMSF and 1 × protease  
535 inhibitor cocktail (Sigma-Aldrich). The lysate was sonicated on ice and centrifuged at 4 °C for  
536 15 minutes, then immunoprecipitated with Flag beads (M8823, Sigma-Aldrich) overnight.  
537 The immunoprecipitates were washed five times with 1 × E1A lysis buffer and samples were  
538 boiled with 2 × sodium dodecyl sulphate (SDS) loading buffer at 100 °C for 10 minutes and  
539 ready for western blot.

540 Western blot was performed by using SDS-polyacrylamide gel electrophoresis,  
541 transferred onto PVDF membranes, blocked with 5% nonfat milk, and then probed with the  
542 following antibodies: anti-METTL3 (1:1000, 15073-1-AP, Proteintech), anti-METTL14  
543 (1:1000, HPA038002, Sigma-Aldrich), anti-WTAP (1:1000, ab195380, Abcam), anti-SRSF7  
544 (1:1000, 11044-1-AP, Proteintech), anti-PBK (1:1000, 16110-1-AP, Proteintech),  
545 anti- $\alpha$ -tubulin (1:1000, 66031, Proteintech), anti-Flag (1:1000, F3615, Sigma-Aldrich).

### 546 **3D Structured Illumination Microscopy (3D-SIM)**

547 For protein colocalization between SRSF7 and methyltransferase complex,  $1.5 \times 10^3$  cells of  
548 SRSF7 (Flag-tagged) overexpressed U87MG stable cell line were seeded into a chambered  
549 cover glass (Lab-Tek, Cat #155411), and the immunofluorescence staining was performed



550 with Immunofluorescence Application Solutions Kit (CST, #12727) according to the  
551 manufacturer's protocol. In brief, cells were fixed with 4% formaldehyde the next day, and  
552 then permeabilized with 0.2% Triton X-100 and blocked with Immunofluorescence Blocking  
553 Buffer for 1 hour, then incubated with primary antibodies (anti-METTTL3: 1:1000, ab195352,  
554 Abcam; anti-METTTL14: 1:200, HPA038002, Sigma-Aldrich; anti-WTAP: 1:500, ab195380,  
555 Abcam; anti-Flag: 1:200, F3165, Sigma-Aldrich) at 4 °C overnight. The samples were washed  
556 three times with 1× Wash Buffer the next day and probed with Alexa 488- and 647-  
557 conjugated secondary antibodies (Thermo Fisher Scientific). The images were taken by using  
558 100× oil-immersion objective of A1R N-SIM N-STORM microscope (Nikon). All SIM  
559 images were cropped and processed with NIS Elements software.

560 For nuclear speckle localization of methyltransferase, the U87MG cells were transfected  
561 with *SRSF7* siRNA and negative control siRNA for 48 hours, and the immunofluorescence  
562 staining was performed as described above, and incubated with primary antibodies  
563 (anti-METTTL3: 1:1000, ab195352, Abcam; anti-METTTL14: 1:200, HPA038002,  
564 Sigma-Aldrich; anti-WTAP: 1:500, ab195380, Abcam; anti-SC35: 1:200, ab11826, Abcam) at  
565 4 °C overnight.

#### 566 **RNA isolation, quantitative reverse transcriptase PCR**

567 Total RNA was extracted using Trizol reagent (Thermo Fisher Scientific). 1 µg RNA was  
568 reverse transcribed using GoScript Reverse Transcription Mix (A2790, Promega,) according  
569 to the manufacturer's protocol. Quantitative real time PCR was performed using SYBR qPCR  
570 master Mix (Vazyme). Primers used in the qRT-PCR are listed in Table S3.

#### 571 **m<sup>6</sup>A-seq**

572 Low input m<sup>6</sup>A-seq was performed by using a protocol reported by Zeng *et al* [68] with some  
573 modifications. Briefly, total RNA was isolated from control U87MG cells and U87MG cells

574 transfected with si-*SRSF7-1* for 48 hours. A total volume of 8-10  $\mu$ g total RNA was  
575 fragmented using the 10  $\times$  RNA Fragmentation Buffer (100mM Tris-HCl, 100 mM ZnCl<sub>2</sub>).  
576 The fragmented RNA was immunoprecipitated with 5  $\mu$ g anti- m<sup>6</sup>A antibody (202003,  
577 Synaptic Systems), 30  $\mu$ l protein-A/G magnetic beads (10002D/10004D, Thermo Fisher  
578 Scientific), 200U RNase inhibitor (N2611, Promega) in 500  $\mu$ l IP Buffer (150 mM NaCl, 10  
579 mM Tris-HCl, pH 7.5, 0.1% IGEPAL CA-630 in nuclease free H<sub>2</sub>O) at 4 $\square$  for 6 hours. Then  
580 washed twice using IP buffer and eluted by competition with m<sup>6</sup>A sodium salt (M2780,  
581 Sigma-Aldrich). For high-throughput sequencing, both input and IP samples were used for  
582 library construction with the SMARTer Stranded Total RNA-seq Kit v2 (634413, Takara),  
583 and sequenced by Illumina HiSeq X Ten to produce 150 bp paired-end reads.

#### 584 **iCLIP-seq**

585 iCLIP was performed based on a protocol described by Yao *et al* [69] with minor  
586 modifications. Briefly, U87MG cells were UV-crosslinked with 400 mJ/cm<sup>2</sup> at 254 nm and  
587 lysed with 500  $\mu$ l cell lysis buffer (50 mM Tris-HCl, pH 7.4; 100 mM NaCl; 1 % NP-40; 0.1%  
588 SDS; 0.5% sodium deoxycholate), followed by immunoprecipitation with 10  $\mu$ g anti-SRSF7  
589 antibody (RN079PW, MBL), 100  $\mu$ l protein A beads (10002D, Thermo Fisher Scientific) at 4 $\square$   
590 overnight and washing as described. After dephosphorylation of the 5' ends of RNAs, linker  
591 ligation, RNA 5' end labeling, SDS-PAGE and membrane transfer, the RNA was harvested  
592 and reverse transcribed by Superscript III (Thermo Fisher Scientific). The cDNA libraries  
593 were generated as protocol described and sequenced by Illumina NovaSeq 6000 to produce  
594 50bp single-end reads.

#### 595 **Validation of differentially methylated m<sup>6</sup>A sites**

596 We used SELECT method to validate the differentially methylated m<sup>6</sup>A sites according to the  
597 described protocol [41]. Briefly, total RNA was mixed with 40 nM up/down primer and 5  $\mu$ M

598 dNTP in 17  $\mu$ l 1  $\times$  CutSmart buffer. The mixture was annealed at a temperature gradient:  
599 90°C, 1min; 80°C, 1min; 70°C, 1min; 60°C, 1min; 50°C, 1min, and 40°C, 6min. Then 0.5 U  
600 SplintR ligase, 0.01 U *Bst* 2.0 DNA polymerase and 10 nmol ATP was added to a final  
601 volume of 20  $\mu$ l and incubated at 40°C for 20 minutes, denatured at 80°C for 20 minutes,  
602 followed by qPCR. The Ct values of SELECT samples at indicated m<sup>6</sup>A site were normalized  
603 to the Ct values of corresponding non-modification control site. Primers used in the SELECT  
604 assay are listed in Table S3.

### 605 **Tethering assay**

606 The full-length coding regions of *SRSF7* and *METTL3* fused with a lambda peptide sequence  
607 were cloned into pcDNA3.1, the plasmid with only a lambda peptide sequence was used as  
608 negative control. The reporter plasmid (pmirGLO-dual luciferase-5BoxB) and the effector  
609 plasmids ( $\lambda$ , *SRSF7*- $\lambda$ , *METTL3*- $\lambda$ ) was transfected in U87MG cells at the ratio 1:9. The  
610 transfected cells were harvested at 24 hours after transfection and the total RNA was extracted  
611 with Trizol reagent (Thermo Fisher Scientific) and subjected to SELCET analysis [41].  
612 Primers designed for plasmid construction and SELECT are listed in Table S3.

### 613 **RNA immunoprecipitation-qPCR analysis**

614 Cells were harvested and lysed in NP-40 lysis buffer (20 mM Tris-HCl at pH 7.5, 100 mM  
615 KCl, 5 mM MgCl<sub>2</sub>, and 0.5% NP-40), then cell lysates were immunoprecipitated with 10  $\mu$ g  
616 anti-METTL3 (15073-1-AP, Proteintech), or anti-METTL14 (26158-1-AP, Proteintech), or  
617 anti-WTAP (ab195380, Abcam) respectively, and 100  $\mu$ l protein G beads (10004D, Thermo  
618 Fisher Scientific) at 4°C overnight, followed by DNase I treatment, proteinase K treatment.  
619 The bound RNAs were extracted by Trizol reagent, reverse transcribed into cDNAs, and  
620 subjected to qPCR analysis.

### 621 **Cell proliferation, colony formation assay, migration assay, and sphere formation assay**

622 For cell growth curve,  $1 \times 10^3$  cells were seeded into 96-well plates and stained with MTT  
623 (Sigma-Aldrich) dye, and measured the absorbance at 570 nm. Colony formation was  
624 performed by seeding cells ( $1 \times 10^3$ ) into 12-well plates, cultured for 7 days, then fixed with  
625 methanol and stained with Crystal violet.

626 For EdU assays,  $2 \times 10^4$  cells were seeded into 48-well plates and EdU assays were  
627 performed using the EdU Cell Proliferation Assay Kit (Cat.C10310-1, RiboBio, China). Cell  
628 migration assays were performed by seeding  $2 \times 10^4$  cells into 24-well transwell  
629 polycarbonate membrane cell culture inserts and stained with Crystal violet.

630 For sphere formation assay,  $3 \times 10^3$  cells were seeded into Ultra-Low Attachment  
631 Multiple Well Plate, and cultured in the stem cell culture condition for 7 days.

### 632 **Intracranial Xenograft**

633 Five-week-old female BALB/c nude mice was obtained from Beijing Vital River (Beijing,  
634 China) and divided into two groups (SRSF7-KD and control, n=6 per group). Each mouse  
635 was injected with  $5 \times 10^5$  U87MG cells which expressing luciferase in the right cerebrum.  
636 Tumor growth was monitored by Bioluminescent imaging every week. The study protocol  
637 was approved by the Institutional Animal Care and Use Committee of Sun Yat-sen University  
638 Cancer Center.

### 639 **RNA stability assays**

640 Cells were treated with 5  $\mu$ g/ml actinomycin D (A9415, Sigma-Aldrich) and collected at 0  
641 hour, 3 hours, 6 hours, 9 hours after treatment. The total RNA was isolated, reverse  
642 transcribed into cDNA, and subjected to qPCR analysis.

### 643 **m<sup>6</sup>A-seq data analyses**

644 The first end of the raw paired-end reads of the m<sup>6</sup>A-seq were trimmed to 50 bp from the 3'  
645 end for m<sup>6</sup>A peak calling and downstream analyses. We mapped the reads to hg19 human

646 genome using HISTA2 (v2.1.0) [70]. The m<sup>6</sup>A peaks were identified according to the methods  
647 as described in our previous paper [14, 35], which was modified from the method published  
648 by Dominissini et al [12]. We created 100 bp sliding windows with 50 bp overlapped along  
649 the longest isoforms of each Ensembl annotated gene and calculated the RPKM (Reads Per  
650 Kilobase of transcript, per Million mapped reads) for each window for IP and input  
651 respectively. For each window, the ratio of RPKM+1 between IP and input were calculated as  
652 the intensity. The winscore of each window was then calculated as the ratio of intensities  
653 between this window and the median of all windows in the same gene. Windows with RPKM >  
654 10 in the IP and winscore (enrichment score) > 2 were defined as the enriched windows in  
655 each sample. The m<sup>6</sup>A peaks were defined as the enriched windows with winscores greater  
656 than neighboring windows. The overlapped or just neighboring peaks of the two biological  
657 replicates were merged into larger windows and the 100 bp region in the middle of the merged  
658 peak were considered as the common peaks, which were further filtered by requiring the  
659 winscores > 2 in both replicates. The distributions of m<sup>6</sup>A peaks along 30 bins of mRNA were  
660 calculated as we have previously described [14].

661 The m<sup>6</sup>A ratio, which quantifies m<sup>6</sup>A peaks, of each m<sup>6</sup>A peak were calculated as the  
662 ratio of peak RPKM between IP and input. To calculate the fold change of m<sup>6</sup>A ratios upon  
663 *SRSF7* knockdown, we first took the union of the m<sup>6</sup>A peaks of all samples. The union peaks  
664 of two replicates were merged, centralized, and filtered to obtain a set of 100 bp peak regions  
665 in the same way as above described for obtaining common peaks. To avoid using the  
666 unreliable m<sup>6</sup>A ratios due to tiny denominators, we filtered out the peaks with input window  
667 RPKM < 5 at least one sample or m<sup>6</sup>A ratio < 0.1 in any control samples. Then the m<sup>6</sup>A peaks  
668 with fold change of m<sup>6</sup>A ratios upon *SRSF7* knockdown > 1.5 or < 2/3 were determined as the  
669 up-regulated or down-regulated m<sup>6</sup>A peaks respectively. The data were visualized using the  
670 Integrative Genomics Viewer (IGV) tool [71], the biological replicates were merged and the

671 average read coverages were used for visualization. StringTie (v1.3.4d) [72] was used to  
672 calculate the TPMs (Transcripts Per Million) of Ensembl annotated genes using the input  
673 libraries. We filtered out the genes with mean TPMs < 1 in control samples to avoid using  
674 unreliable fold change of TPMs due to tiny denominators. Differentially expressed genes were  
675 determined using DESeq2 [73] according to the read counts of genes calculated by HTSeq  
676 [74]. The genes with FDR < 0.05 and mean CPM (Counts per Million) > 100 were determined  
677 as the differentially expressed genes. Gene Ontology analysis was performed using DAVID  
678 [75] with all expressed genes (TPM >1) as background. The GSEA analysis was performed  
679 using GSEA (version 2.2.2.0) [76] based on the predefined gene sets from the Molecular  
680 Signatures Database (MSigDB v5.0) [76].

#### 681 **Analyses of the clinical data of glioma patients**

682 The gene expression, mutation, and clinical data of glioma patients were downloaded from  
683 CGGA database (<http://www.cgga.org.cn/>) [36] We used the Cox regression to examine the  
684 correlations between gene expression indexes of the cancer module and patient survival in  
685 each cancer type. The gene expression data of all cancer types were downloaded from  
686 TCGA (<https://tcga-data.nci.nih.gov/>).

#### 687 **iCLIP-seq data analyses**

688 We used the CLIP Tool Kit (CTK) to call the peaks from the iCLIP-seq data according to the  
689 described data processing procedure of iCLIP-seq [38]. HOMER software [77] was used for  
690 motif enrichment analysis with randomly permuted sequences as the background. The  
691 overlapped peaks between the peaks of m<sup>6</sup>A-seq and iCLIP-seq were determined as the peaks  
692 with distances < 100 bp using BEDTools [78].

#### 693 **Alternative splicing and alternative polyadenylation (APA) analyses**

694 We used rMATS [57] to perform the differential alternative splicing analysis using the input  
695 RNAs of m<sup>6</sup>A-seq with FDR < 0.05 as the threshold of significance. The binding enriched of  
696 SRSF7 around splicing events were analyzed using rMAPS2. To test whether the genes with  
697 alternative splicing and the genes with SRSF7 regulated m<sup>6</sup>A are significantly overlapped, we  
698 only considered all m<sup>6</sup>A modified genes with rMATS detected alternative splicing in the  
699 Chi-square test. Differential alternative polyadenylation (APA) analysis was performed using  
700 DaPars [59] with FDR < 0.1 as the threshold of significance.

## 701 **Statistics**

702 Comparisons between two groups were performed using Student's two-tailed *t* test.  
703 Comparisons during more than two groups are performed using ANOVA. Data represent  
704 mean ± SEM, *P* value or adjusted *P* value for ANOVA less than 0.05 were considered  
705 statistically significant. Survival curves were plotted by the Kaplan–Meier method and  
706 compared by the log-rank test. The statistics of bioinformatic analyses were all described  
707 along with the results or figures.

## 708 **Data Availability Statement**

709 The raw sequencing reads of m<sup>6</sup>A-seq and iCLIP-seq have been deposited in Genome  
710 Sequence Archive (GSA) for Human under the accession code HRA001166 (reviewer access  
711 link: <https://ngdc.cnbc.ac.cn/gsa-human/s/vrR56Et5>).

## 712 **Authors' contributions**

713 JW and JLi conceived and supervised the project; YC, CX, Jlan, WL performed experiments  
714 with the assistances from CY, XL, XH, XS, YH, ZL, SZ, GW, MY, MT, RY, XL, GG, WZ;  
715 SA and WC performed bioinformatics analyses with the help of ZW; YC draft the manuscript;

716 JW and JLi revised the manuscript. All authors read and approved the final manuscript.

717 **Competing interests**

718 The authors declare no competing interests.

719 **Acknowledgments**

720 We thank Jianzhao Liu for providing the vectors of tethering assay. This work was supported  
721 by the National Key R&D Program of China [2018YFA0107200 to JW], the National Natural  
722 Science Foundation of China [81830082, 82030078, and 81621004 to JL; 31771446 and  
723 31970594 to JW], Guangzhou Science and Technology Program [201904010181 to JW],  
724 Guangzhou Science and Technology Plan Projects [201803010098 to JL]; Natural Science  
725 Foundation of Guangdong Province [2018B030311009 to JL].

726

727

728



729 **References**

- 730 1. Howard JM, Sanford JR. The RNAissance family: SR proteins as multifaceted  
731 regulators of gene expression. *Wiley Interdiscip Rev RNA* 2015;6:93-110.
- 732 2. Chen J, Crutchley J, Zhang D, Owzar K, Kastan MB. Identification of a DNA  
733 Damage-Induced Alternative Splicing Pathway That Regulates p53 and Cellular  
734 Senescence Markers. *Cancer Discov* 2017;7:766-81.
- 735 3. Huang Y, Yario TA, Steitz JA. A molecular link between SR protein dephosphorylation  
736 and mRNA export. *Proc Natl Acad Sci U S A* 2004;101:9666-70.
- 737 4. Gao L, Wang J, Wang Y, Andreadis A. SR protein 9G8 modulates splicing of tau exon  
738 10 via its proximal downstream intron, a clustering region for frontotemporal  
739 dementia mutations. *Mol Cell Neurosci* 2007;34:48-58.
- 740 5. Muller-McNicoll M, Botti V, de Jesus Domingues AM, Brandl H, Schwich OD,  
741 Steiner MC, et al. SR proteins are NXF1 adaptors that link alternative RNA processing  
742 to mRNA export. *Genes Dev* 2016;30:553-66.
- 743 6. Behan FM, Iorio F, Picco G, Goncalves E, Beaver CM, Migliardi G, et al.  
744 Prioritization of cancer therapeutic targets using CRISPR-Cas9 screens. *Nature*  
745 2019;568:511-6.
- 746 7. Fu Y, Wang Y. SRSF7 knockdown promotes apoptosis of colon and lung cancer cells.  
747 *Oncol Lett* 2018;15:5545-52.
- 748 8. Saijo S, Kuwano Y, Masuda K, Nishikawa T, Rokutan K, Nishida K.  
749 Serine/arginine-rich splicing factor 7 regulates p21-dependent growth arrest in colon  
750 cancer cells. *J Med Invest* 2016;63:219-26.
- 751 9. Park WC, Kim HR, Kang DB, Ryu JS, Choi KH, Lee GO, et al. Comparative  
752 expression patterns and diagnostic efficacies of SR splicing factors and HNRNPA1 in  
753 gastric and colorectal cancer. *BMC Cancer* 2016;16:358.

- 754 10. Song X, Wan X, Huang T, Zeng C, Sastry N, Wu B, et al. SRSF3-Regulated RNA  
755 Alternative Splicing Promotes Glioblastoma Tumorigenicity by Affecting Multiple  
756 Cellular Processes. *Cancer Res* 2019;79:5288-301.
- 757 11. Meyer KD, Saletore Y, Zumbo P, Elemento O, Mason CE, Jaffrey SR. Comprehensive  
758 analysis of mRNA methylation reveals enrichment in 3' UTRs and near stop codons.  
759 *Cell* 2012;149:1635-46.
- 760 12. Dominissini D, Moshitch-Moshkovitz S, Schwartz S, Salmon-Divon M, Ungar L,  
761 Osenberg S, et al. Topology of the human and mouse m6A RNA methylomes revealed  
762 by m6A-seq. *Nature* 2012;485:201-6.
- 763 13. Desrosiers R, Friderici K, Rottman F. Identification of methylated nucleosides in  
764 messenger RNA from Novikoff hepatoma cells. *Proc Natl Acad Sci U S A*  
765 1974;71:3971-5.
- 766 14. Batista PJ, Molinie B, Wang J, Qu K, Zhang J, Li L, et al. m(6)A RNA modification  
767 controls cell fate transition in mammalian embryonic stem cells. *Cell Stem Cell*  
768 2014;15:707-19.
- 769 15. Delaunay S, Frye M. RNA modifications regulating cell fate in cancer. *Nat Cell Biol*  
770 2019;21:552-9.
- 771 16. Shulman Z, Stern-Ginossar N. The RNA modification N(6)-methyladenosine as a  
772 novel regulator of the immune system. *Nat Immunol* 2020;21:501-12.
- 773 17. Barbieri I, Kouzarides T. Role of RNA modifications in cancer. *Nat Rev Cancer*  
774 2020;20:303-22.
- 775 18. Livneh I, Moshitch-Moshkovitz S, Amariglio N, Rechavi G, Dominissini D. The  
776 m(6)A epitranscriptome: transcriptome plasticity in brain development and function.  
777 *Nat Rev Neurosci* 2020;21:36-51.
- 778 19. Zaccara S, Ries RJ, Jaffrey SR. Reading, writing and erasing mRNA methylation. *Nat*

- 779 Rev Mol Cell Biol 2019;20:608-24.
- 780 20. Shi H, Wei J, He C. Where, When, and How: Context-Dependent Functions of RNA  
781 Methylation Writers, Readers, and Erasers. Mol Cell 2019;74:640-50.
- 782 21. Jia G, Fu Y, Zhao X, Dai Q, Zheng G, Yang Y, et al. N6-methyladenosine in nuclear  
783 RNA is a major substrate of the obesity-associated FTO. Nat Chem Biol 2011;7:885-7.
- 784 22. Zheng G, Dahl JA, Niu Y, Fedorcsak P, Huang CM, Li CJ, et al. ALKBH5 is a  
785 mammalian RNA demethylase that impacts RNA metabolism and mouse fertility. Mol  
786 Cell 2013;49:18-29.
- 787 23. Wang X, Lu Z, Gomez A, Hon GC, Yue Y, Han D, et al.  
788 N6-methyladenosine-dependent regulation of messenger RNA stability. Nature  
789 2014;505:117-20.
- 790 24. Wang X, Zhao BS, Roundtree IA, Lu Z, Han D, Ma H, et al. N(6)-methyladenosine  
791 Modulates Messenger RNA Translation Efficiency. Cell 2015;161:1388-99.
- 792 25. Hsu PJ, Zhu Y, Ma H, Guo Y, Shi X, Liu Y, et al. Ythdc2 is an N(6)-methyladenosine  
793 binding protein that regulates mammalian spermatogenesis. Cell Res  
794 2017;27:1115-27.
- 795 26. Shi H, Wang X, Lu Z, Zhao BS, Ma H, Hsu PJ, et al. YTHDF3 facilitates translation  
796 and decay of N(6)-methyladenosine-modified RNA. Cell Res 2017;27:315-28.
- 797 27. Huang H, Weng H, Sun W, Qin X, Shi H, Wu H, et al. Recognition of RNA  
798 N(6)-methyladenosine by IGF2BP proteins enhances mRNA stability and translation.  
799 Nat Cell Biol 2018;20:285-95.
- 800 28. Liu J, Dou X, Chen C, Chen C, Liu C, Xu MM, et al. N (6)-methyladenosine of  
801 chromosome-associated regulatory RNA regulates chromatin state and transcription.  
802 Science 2020;367:580-6.
- 803 29. Li Y, Xia L, Tan K, Ye X, Zuo Z, Li M, et al. N(6)-Methyladenosine

- 804 co-transcriptionally directs the demethylation of histone H3K9me2. *Nat Genet*  
805 2020;52:870-7.
- 806 30. Yue Y, Liu J, Cui X, Cao J, Luo G, Zhang Z, et al. VIRMA mediates preferential  
807 m(6)A mRNA methylation in 3'UTR and near stop codon and associates with  
808 alternative polyadenylation. *Cell Discov* 2018;4:10.
- 809 31. Wen J, Lv R, Ma H, Shen H, He C, Wang J, et al. Zc3h13 Regulates Nuclear RNA  
810 m(6)A Methylation and Mouse Embryonic Stem Cell Self-Renewal. *Mol Cell*  
811 2018;69:1028-38 e6.
- 812 32. Huang H, Weng H, Zhou K, Wu T, Zhao BS, Sun M, et al. Histone H3 trimethylation  
813 at lysine 36 guides m(6)A RNA modification co-transcriptionally. *Nature*  
814 2019;567:414-9.
- 815 33. Bertero A, Brown S, Madrigal P, Osnato A, Ortmann D, Yiangou L, et al. The  
816 SMAD2/3 interactome reveals that TGFbeta controls m(6)A mRNA methylation in  
817 pluripotency. *Nature* 2018;555:256-9.
- 818 34. Lee Y, Rio DC. Mechanisms and Regulation of Alternative Pre-mRNA Splicing. *Annu*  
819 *Rev Biochem* 2015;84:291-323.
- 820 35. An S, Huang W, Huang X, Cun Y, Cheng W, Sun X, et al. Integrative network analysis  
821 identifies cell-specific trans regulators of m6A. *Nucleic Acids Res* 2020;48:1715-29.
- 822 36. Zhao Z, Zhang KN, Wang Q, Li G, Zeng F, Zhang Y, et al. Chinese Glioma Genome  
823 Atlas (CGGA): A Comprehensive Resource with Functional Genomic Data from  
824 Chinese Glioma Patients. *Genomics Proteomics Bioinformatics* 2021.
- 825 37. Konig J, Zarnack K, Rot G, Curk T, Kayikci M, Zupan B, et al. iCLIP reveals the  
826 function of hnRNP particles in splicing at individual nucleotide resolution. *Nat Struct*  
827 *Mol Biol* 2010;17:909-15.
- 828 38. Shah A, Qian Y, Weyn-Vanhentenryck SM, Zhang C. CLIP Tool Kit (CTK): a flexible

- 829 and robust pipeline to analyze CLIP sequencing data. *Bioinformatics* 2017;33:566-7.
- 830 39. Konigs V, de Oliveira Freitas Machado C, Arnold B, Blumel N, Solovyeva A, Lobbert  
831 S, et al. SRSF7 maintains its homeostasis through the expression of Split-ORFs and  
832 nuclear body assembly. *Nat Struct Mol Biol* 2020;27:260-73.
- 833 40. Behm-Ansmant I, Rehwinkel J, Doerks T, Stark A, Bork P, Izaurralde E. mRNA  
834 degradation by miRNAs and GW182 requires both CCR4:NOT deadenylase and  
835 DCP1:DCP2 decapping complexes. *Genes Dev* 2006;20:1885-98.
- 836 41. Xiao Y, Wang Y, Tang Q, Wei L, Zhang X, Jia G. An Elongation- and Ligation-Based  
837 qPCR Amplification Method for the Radiolabeling-Free Detection of Locus-Specific  
838 N(6)-Methyladenosine Modification. *Angew Chem Int Ed Engl* 2018;57:15995-6000.
- 839 42. Tang Y, Chen K, Song B, Ma J, Wu X, Xu Q, et al. m6A-Atlas: a comprehensive  
840 knowledgebase for unraveling the N6-methyladenosine (m6A) epitranscriptome.  
841 *Nucleic Acids Res* 2021;49:D134-D43.
- 842 43. Linder B, Grozhik AV, Olarerin-George AO, Meydan C, Mason CE, Jaffrey SR.  
843 Single-nucleotide-resolution mapping of m6A and m6Am throughout the  
844 transcriptome. *Nat Methods* 2015;12:767-72.
- 845 44. Li F, Yi Y, Miao Y, Long W, Long T, Chen S, et al. N(6)-Methyladenosine Modulates  
846 Nonsense-Mediated mRNA Decay in Human Glioblastoma. *Cancer Res*  
847 2019;79:5785-98.
- 848 45. Visvanathan A, Patil V, Arora A, Hegde AS, Arivazhagan A, Santosh V, et al. Essential  
849 role of METTL3-mediated m(6)A modification in glioma stem-like cells maintenance  
850 and radioresistance. *Oncogene* 2018;37:522-33.
- 851 46. Zhang S, Zhao BS, Zhou A, Lin K, Zheng S, Lu Z, et al. m(6)A Demethylase  
852 ALKBH5 Maintains Tumorigenicity of Glioblastoma Stem-like Cells by Sustaining  
853 FOXM1 Expression and Cell Proliferation Program. *Cancer Cell* 2017;31:591-606 e6.

- 854 47. Cui Q, Shi H, Ye P, Li L, Qu Q, Sun G, et al. m(6)A RNA Methylation Regulates the  
855 Self-Renewal and Tumorigenesis of Glioblastoma Stem Cells. *Cell Rep*  
856 2017;18:2622-34.
- 857 48. Li Z, Weng H, Su R, Weng X, Zuo Z, Li C, et al. FTO Plays an Oncogenic Role in  
858 Acute Myeloid Leukemia as a N(6)-Methyladenosine RNA Demethylase. *Cancer Cell*  
859 2017;31:127-41.
- 860 49. Liu J, Eckert MA, Harada BT, Liu SM, Lu Z, Yu K, et al. m(6)A mRNA methylation  
861 regulates AKT activity to promote the proliferation and tumorigenicity of endometrial  
862 cancer. *Nat Cell Biol* 2018;20:1074-83.
- 863 50. Liu T, Wei Q, Jin J, Luo Q, Liu Y, Yang Y, et al. The m6A reader YTHDF1 promotes  
864 ovarian cancer progression via augmenting EIF3C translation. *Nucleic Acids Res*  
865 2020;48:3816-31.
- 866 51. Paris J, Morgan M, Campos J, Spencer GJ, Shmakova A, Ivanova I, et al. Targeting  
867 the RNA m(6)A Reader YTHDF2 Selectively Compromises Cancer Stem Cells in  
868 Acute Myeloid Leukemia. *Cell Stem Cell* 2019;25:137-48 e6.
- 869 52. Shih MC, Chen JY, Wu YC, Jan YH, Yang BM, Lu PJ, et al. TOPK/PBK promotes cell  
870 migration via modulation of the PI3K/PTEN/AKT pathway and is associated with  
871 poor prognosis in lung cancer. *Oncogene* 2012;31:2389-400.
- 872 53. Ayllon V, O'Connor R. PBK/TOPK promotes tumour cell proliferation through p38  
873 MAPK activity and regulation of the DNA damage response. *Oncogene*  
874 2007;26:3451-61.
- 875 54. Gao T, Hu Q, Hu X, Lei Q, Feng Z, Yu X, et al. Novel selective TOPK inhibitor  
876 SKLB-C05 inhibits colorectal carcinoma growth and metastasis. *Cancer Lett*  
877 2019;445:11-23.
- 878 55. Joel M, Mughal AA, Grieg Z, Murrell W, Palmero S, Mikkelsen B, et al. Targeting

- 879 PBK/TOPK decreases growth and survival of glioma initiating cells in vitro and  
880 attenuates tumor growth in vivo. *Mol Cancer* 2015;14:121.
- 881 56. Yang QX, Zhong S, He L, Jia XJ, Tang H, Cheng ST, et al. PBK overexpression  
882 promotes metastasis of hepatocellular carcinoma via activating ETV4-uPAR signaling  
883 pathway. *Cancer Lett* 2019;452:90-102.
- 884 57. Shen S, Park JW, Lu ZX, Lin L, Henry MD, Wu YN, et al. rMATS: robust and flexible  
885 detection of differential alternative splicing from replicate RNA-Seq data. *Proc Natl*  
886 *Acad Sci U S A* 2014;111:E5593-601.
- 887 58. Hwang JY, Jung S, Kook TL, Rouchka EC, Bok J, Park JW. rMAPS2: an update of the  
888 RNA map analysis and plotting server for alternative splicing regulation. *Nucleic*  
889 *Acids Res* 2020;48:W300-W6.
- 890 59. Xia Z, Donehower LA, Cooper TA, Neilson JR, Wheeler DA, Wagner EJ, et al.  
891 Dynamic analyses of alternative polyadenylation from RNA-seq reveal a 3'-UTR  
892 landscape across seven tumour types. *Nat Commun* 2014;5:5274.
- 893 60. Lindtner S, Zolotukhin AS, Uranishi H, Bear J, Kulkarni V, Smulevitch S, et al.  
894 RNA-binding motif protein 15 binds to the RNA transport element RTE and provides  
895 a direct link to the NXF1 export pathway. *J Biol Chem* 2006;281:36915-28.
- 896 61. Xiao W, Adhikari S, Dahal U, Chen YS, Hao YJ, Sun BF, et al. Nuclear m(6)A Reader  
897 YTHDC1 Regulates mRNA Splicing. *Mol Cell* 2016;61:507-19.
- 898 62. Kasowitz SD, Ma J, Anderson SJ, Leu NA, Xu Y, Gregory BD, et al. Nuclear m6A  
899 reader YTHDC1 regulates alternative polyadenylation and splicing during mouse  
900 oocyte development. *PLoS Genet* 2018;14:e1007412.
- 901 63. Ke S, Alemu EA, Mertens C, Gantman EC, Fak JJ, Mele A, et al. A majority of m6A  
902 residues are in the last exons, allowing the potential for 3' UTR regulation. *Genes Dev*  
903 2015;29:2037-53.

- 904 64. Molinie B, Wang J, Lim KS, Hillebrand R, Lu ZX, Van Wittenberghe N, et al.  
905 m(6)A-LAIC-seq reveals the census and complexity of the m(6)A epitranscriptome.  
906 Nat Methods 2016;13:692-8.
- 907 65. Wang J. Integrative analyses of transcriptome data reveal the mechanisms of  
908 post-transcriptional regulation. Brief Funct Genomics 2021:(advance online  
909 publication).
- 910 66. Lian H, Wang QH, Zhu CB, Ma J, Jin WL. Deciphering the Epitranscriptome in  
911 Cancer. Trends Cancer 2018;4:207-21.
- 912 67. Wen PY, Kesari S. Malignant gliomas in adults. N Engl J Med 2008;359:492-507.
- 913 68. Zeng Y, Wang S, Gao S, Soares F, Ahmed M, Guo H, et al. Refined RIP-seq protocol  
914 for epitranscriptome analysis with low input materials. PLoS Biol 2018;16:e2006092.
- 915 69. Yao C, Weng L, Shi Y. Global protein-RNA interaction mapping at single nucleotide  
916 resolution by iCLIP-seq. Methods Mol Biol 2014;1126:399-410.
- 917 70. Kim D, Paggi JM, Park C, Bennett C, Salzberg SL. Graph-based genome alignment  
918 and genotyping with HISAT2 and HISAT-genotype. Nat Biotechnol 2019;37:907-15.
- 919 71. Robinson JT, Thorvaldsdottir H, Winckler W, Guttman M, Lander ES, Getz G, et al.  
920 Integrative genomics viewer. Nat Biotechnol 2011;29:24-6.
- 921 72. Pertea M, Pertea GM, Antonescu CM, Chang TC, Mendell JT, Salzberg SL. StringTie  
922 enables improved reconstruction of a transcriptome from RNA-seq reads. Nat  
923 Biotechnol 2015;33:290-5.
- 924 73. Love MI, Huber W, Anders S. Moderated estimation of fold change and dispersion for  
925 RNA-seq data with DESeq2. Genome Biol 2014;15:550.
- 926 74. Anders S, Pyl PT, Huber W. HTSeq--a Python framework to work with  
927 high-throughput sequencing data. Bioinformatics 2015;31:166-9.
- 928 75. Huang da W, Sherman BT, Lempicki RA. Bioinformatics enrichment tools: paths



929 toward the comprehensive functional analysis of large gene lists. *Nucleic Acids Res*  
930 2009;37:1-13.

931 76. Subramanian A, Tamayo P, Mootha VK, Mukherjee S, Ebert BL, Gillette MA, et al.  
932 Gene set enrichment analysis: a knowledge-based approach for interpreting  
933 genome-wide expression profiles. *Proc Natl Acad Sci U S A* 2005;102:15545-50.

934 77. Heinz S, Benner C, Spann N, Bertolino E, Lin YC, Laslo P, et al. Simple combinations  
935 of lineage-determining transcription factors prime cis-regulatory elements required for  
936 macrophage and B cell identities. *Mol Cell* 2010;38:576-89.

937 78. Quinlan AR, Hall IM. BEDTools: a flexible suite of utilities for comparing genomic  
938 features. *Bioinformatics* 2010;26:841-2.

939

940

941 **Figure legends**

942 **Figure 1 SRSF7 is a potential m<sup>6</sup>A regulator that interacts with m<sup>6</sup>A methyltransferase**  
943 **complex**

944 **A.** The boxplot (upper panel) and heatmap representing the m<sup>6</sup>A ratios of the m<sup>6</sup>A peaks  
945 within the co-methylation module M5 as well as the heatmap representing the gene  
946 expressions of the RBPs that significantly correlated with the m<sup>6</sup>A indexes of M5 (lower  
947 panel). The cell lines are sorted according to the m<sup>6</sup>A indexes of M5, glioblastoma cell lines  
948 were colored red. **B.** GO enrichment analysis of corresponding genes in module M5. **C.** The  
949 x-axis represents the logarithm transformed *P* values of the correlations between the  
950 expression of RBPs and the m<sup>6</sup>A indexes of co-methylation module M5; the y-axis represents  
951 the logarithm transformed *P* values of the overall survival (OS) of these 6 RBPs in GBM  
952 patients. **D.** Scatter plots representing the correlation between the expression of *SRSF7* and  
953 m<sup>6</sup>A indexes of module M5 across 25 cell lines. The *P* value and correlation coefficient are  
954 indicated at the bottom right corner. **E.** Kaplan-Meier analysis of overall survival (OS) based  
955 on *SRSF7* expression of GBM patients from CGGA dataset. **F, G.** Western blots showing  
956 Flag-tagged *SRSF7* interacts with endogenous METTL3, METTL14 and WTAP without (F)  
957 and with (G) RNase treatment respectively in U87MG cells. **H, I.** Western blots showing  
958 Flag-tagged METTL3 (H) and WTAP (I) interact with endogenous *SRSF7* with RNase  
959 treatment in U87MG cells. **J.** Western blots showing Flag-tagged full-length and truncated  
960 *SRSF7* interact with HA-tagged METTL3 and endogenous METTL14 and WTAP with RNase  
961 treatment in U87MG cells. **K.** 3D-SIM imaging indicating *SRSF7* is co-localized with  
962 METTL3, METTL14, and WTAP in the nucleus, Scale Bar: 2 μm.

963

964 **Figure 2 SRSF7 specifically facilitates m<sup>6</sup>A methylation near its binding sites via**  
965 **recruiting METTL3**

966 **A.** Scatter plots showing the up-regulated (orange) and down-regulated (purple) m<sup>6</sup>A peaks in  
967 si-*SRSF7* as compared with si-NC in U87MG cells. The numbers of the up-regulated and  
968 down-regulated peaks are indicated. **B.** The most significantly enriched motifs in the  
969 iCLIP-seq identified SRSF7 binding peaks. **C.** Normalized distributions of m<sup>6</sup>A peaks and  
970 SRSF7 iCLIP-seq peaks across 5'UTR, CDS, and 3'UTR of mRNA. **D.** Box plot comparing  
971 the m<sup>6</sup>A ratios of the SRSF7 targeted m<sup>6</sup>A peaks in control and SRSF7-KD U87MG cells. **E.**  
972 Plot of cumulative fraction of log<sub>2</sub> fold change of m<sup>6</sup>A ratios upon *SRSF7* knockdown using  
973 si-*SRSF7* for the m<sup>6</sup>A peaks overlap or non-overlap with SRSF7 iCLIP-seq peaks. *P* value of  
974 two-tailed Wilcoxon test is indicated. **F.** Plot of GSEA analysis displaying the distribution of  
975 SRSF7 iCLIP-seq peaks (upper panel) across the m<sup>6</sup>A peaks ranked by log<sub>2</sub> fold change of  
976 m<sup>6</sup>A ratios upon *SRSF7* knockdown (si-*SRSF7*) (lower panel). The m<sup>6</sup>A peaks overlap SRSF7  
977 iCLIP-seq peaks are indicated by vertical line in the upper panel. The *P* value and normalized  
978 enrichment score (NES) of GSEA are indicated. **G.** Bar plot comparing the percentages of  
979 m<sup>6</sup>A peaks overlapped with SRSF7 iCLIP-seq peaks for down-regulated, up-regulated, and  
980 unchanged m<sup>6</sup>A peaks upon *SRSF7* knockdown respectively. The pairwise *P* values of  
981 two-tailed Chi-square tests are indicated at the top. **H.** Bar plot comparing the percentages of  
982 m<sup>6</sup>A modified genes for genes with down-regulated, up-regulated, and unchanged gene  
983 expression upon *SRSF7* knockdown respectively. The pairwise *P* values of two-tailed  
984 Chi-square tests are indicated at the top. **I.** Plot of cumulative fraction of log<sub>2</sub> fold change of  
985 gene expression upon *SRSF7* knockdown for unmethylated genes and genes with SRSF7  
986 targeted m<sup>6</sup>A peaks respectively. *P* value of two-tailed Wilcoxon test is indicated. **J.**  
987 Schematic diagram displaying the construct of the SRSF7 tethering assay with GGACU m<sup>6</sup>A  
988 motif (upper) and disruptive GGAUU motif (lower). **K.** Bar plot comparing the SELECT

989 method measured relative ligation product, which anti-correlated with the m<sup>6</sup>A level, for the  
990 m<sup>6</sup>A site in F-luc-5BoxB without or with mutation in the m<sup>6</sup>A motif in U87MG cells  
991 transfected with Control-λ, SRSF7-λ, and METTL3-λ respectively. Data are presented as  
992 mean ± SEM, n=3. \*\* *P* <0.01, ns, no significant difference. One-way ANOVA with  
993 Dunnett's post hoc test. **L.** Bar plot comparing the METTL3 RIP-qPCR enrichment of the  
994 F-luc mRNA in U87MG cells transfected with SRSF7-λ and Control-λ respectively. Data are  
995 presented as mean ± SEM, n=3. \* *P* <0.05. Student's two-tailed *t* test.

996 **Figure 3 SRSF7 specifically targets and facilitates the methylation of m<sup>6</sup>A on genes**

997 **involved in cell proliferation and migration**

998 **A.** Venn diagram showing the overlapping of down-regulated m<sup>6</sup>A peaks upon *SRSF7*  
999 knockdown and SRSF7 iCLIP-seq peaks. **B.** Normalized distribution of the overlapped m<sup>6</sup>A  
1000 peaks in (a) across 5'UTR, CDS, and 3'UTR of mRNA. **C.** GO enrichment of the  
1001 corresponding genes with the overlapped m<sup>6</sup>A peaks in (A). **D, E.** Tracks displaying the read  
1002 coverage of IPs and inputs of m<sup>6</sup>A-seq as well as the SRSF7 iCLIP-seq on *PBK*, *MCM4*. The  
1003 SRSF7 directly regulated m<sup>6</sup>A peaks are highlighted. The y-axes of NC and si-SRSF7 were  
1004 differently used to intuitively indicate the m<sup>6</sup>A differences other than expression differences.  
1005 **F-I.** Validation of m<sup>6</sup>A changes using SELECT method of single-nucleotide m<sup>6</sup>A sites on *PBK*  
1006 at 1041 and 1071 (F-G), *MCM4* at 1515 (H), *ROBO1* at 672 (I) in U87MG cells transfected  
1007 with scramble (si-NC) and 2 siRNAs of SRSF7 (si-*SRSF7*-1, si-*SRSF*-2), and 2 siRNAs of  
1008 METTL3 (si-*METTL3*-1, si-*METTL3*-2) respectively. The tested m<sup>6</sup>A motifs are indicated on  
1009 the schematic structures of mRNAs at the top panels. The green boxes represent  
1010 protein-coding regions, the thin lines flanking the green boxes represent UTR regions. Arrows  
1011 indicate the primers for SELECT. Data are presented as mean ± SEM, n=3. \* *P* <0.05, \*\* *P*  
1012 <0.01, \*\*\* *P* <0.001. One-way ANOVA with Dunnett's post hoc test. **J-L.** Bar plot comparing  
1013 the RIP-qPCR determined relative enrichment of METTL3 (J), METTL14 (K), and WTAP (L)

1014 binding to the mRNA of *PBK*, *MCM4*, and *ROBO1* in control and *SRSF7*-KD U87MG cells.  
1015 Data are presented as mean  $\pm$  SEM, n=3. \*  $P < 0.05$ , \*\*  $P < 0.01$ , \*\*\*  $P < 0.001$ . Student's  
1016 two-tailed  $t$  test.

1017 **Figure 4 SRSF7 promotes proliferation and migration of glioblastoma cells**

1018 **A.** Boxplot comparing the expression of *SRSF7* during GBM patients of different stages from  
1019 CGGA dataset.  $P$  values of two-tailed Student's  $t$  test are indicated. **B.** Left: IHC staining of  
1020 *SRSF7* in normal brain and glioma specimens, Scale Bar: 20  $\mu$ M. **C.** Bar plot comparing the  
1021 mRNA expression levels of *SRSF7* in 11 GBM cell lines and Normal Human Astrocytes  
1022 (NHA). Data are presented as mean  $\pm$  SEM (standard error of mean), n=2. \*  $P < 0.05$ , \*\*  $P <$   
1023 0.01, \*\*\*  $P < 0.001$ , ns, no significant difference. One-way ANOVA with Dunnett's post hoc  
1024 test. **D.** Western blot comparing the protein levels of *SRSF7* in 11 GBM cell lines and NHA.  
1025 **E.** Western blot showing efficiently overexpression of *SRSF7* in U87MG and LN229 cells. **F.**  
1026 Representative images of transwell migration assay in U87MG and LN229 cells  
1027 overexpressing *SRSF7*. Scar bars: 50  $\mu$ m. **G, H.** The cell viability of *SRSF7* knockdown and  
1028 control in U87MG (G) and LN229 (H) cells were measured by MTT assay at indicated time  
1029 point. Data are presented as mean  $\pm$  SEM, n = 3. \*\*\*  $P < 0.001$ . Two-way ANOVA with  
1030 Dunnett's post hoc test. **I.** Representative bioluminescence images of mice-bearing the  
1031 intracranial glioma xenografts formed by U87MG cells transduced with control shRNA or  
1032 *SRSF7* shRNA respectively. **J.** Line graph showing the normalized luminescence of  
1033 intracranial glioma xenografts tumors formed by U87MG cells transduced with control  
1034 shRNA or *SRSF7* shRNA respectively. Data are presented as mean  $\pm$  SEM, n = 6. \*\*\*  $P <$   
1035 0.001. Student's two-tailed  $t$  test. **K.** Representative images of H&E staining of glioma tissue  
1036 sections from indicated mice, Scale Bar: 2mm.

1037 **Figure 5 SRSF7 promotes the proliferation and migration of glioblastoma cells**  
1038 **partially dependent on METTL3**

1039 **A.** Western blot showing the protein level of SRSF7 and METTL3 in SRSF7 overexpressed  
1040 U87MG and LN229 cells transfected without or with si-*METTL3*-1 cell as indicated. **B, C.**  
1041 Representative images (B) and bar plot (C) comparing the number of migrated cells in  
1042 transwell migration assay in SRSF7 overexpressed U87MG and LN229 cells transfected  
1043 without or with si-*METTL3*-1 cell as indicated. Data are presented as mean  $\pm$  SEM, n = 5. \*\*\*  
1044  $P < 0.001$ . ns, no significant difference. One-way ANOVA with Tukey's post hoc test. Scar  
1045 bars: 50  $\mu$ m. **D-E.** Representative images of EdU staining in SRSF7 overexpressed U87MG  
1046 (D) and LN229 (E) cells transfected without or with si-*METTL3*-1 as indicated. Scar bars: 50  
1047  $\mu$ m. **F.** Bar plot comparing the EdU positive rate of EdU staining in SRSF7 overexpressed  
1048 U87MG and LN229 cells transfected without or with si-*METTL3*-1 as indicated. Data are  
1049 presented as mean  $\pm$  SEM, n = 5. \*  $P < 0.05$ , \*\*\*  $P < 0.001$ . ns, no significant difference.  
1050 One-way ANOVA with Tukey's post hoc test.

1051 **Figure 6 SRSF7 promotes the proliferation and migration of GBM cells partially**  
1052 **through the m<sup>6</sup>A on PBK mRNA**

1053 **A.** Scatter plot showing the correlation between *SRSF7* and *PBK* gene expression across  
1054 GBM patients from CGGA dataset, the  $P$  value and correlation coefficient are indicated. **B, C.**  
1055 Representative images (B) and bar plot (C) comparing the number of migrated cells in  
1056 transwell migration assay in U87MG and LN229 cells upon *SRSF7* knockdown and rescue by  
1057 co-transducing full-length WT *PBK* CDS regions. Data are presented as mean  $\pm$  SEM, n = 5.  
1058 \*\*  $P < 0.01$ , \*\*\*  $P < 0.001$ . One-way ANOVA with Tukey's post hoc test. Scar bars: 50  $\mu$ m.  
1059 **D.** Bar plot showing the relative mRNA level of *SRSF7* and *PBK* in U87MG cells transfected  
1060 with scramble (si-NC) and 3 different siRNAs of *SRSF7* respectively. Data are presented as  
1061 mean  $\pm$  SEM, n = 3. \*\*  $P < 0.01$ , \*\*\*  $P < 0.001$ . Student's two-tailed  $t$  test. **E.** Western bolt

1062 comparing the protein levels of SRSF7 and PBK in U87MG cells transfected with scramble  
1063 (si-NC) and 3 different siRNAs of *SRSF7* respectively. **F.** Bar plot showing the relative  
1064 mRNA level of *PBK* in SRSF7 overexpressed U87MG cells transfected without or with  
1065 si-*METTL3-1* as indicated. Data are presented as mean  $\pm$  SEM, n = 3. \*\*\*  $P < 0.001$ , ns, no  
1066 significant difference. One-way ANOVA with Tukey's post hoc test. **G.** Relative mRNA levels  
1067 of *PBK* after actinomycin D treatment at indicated time points in U87MG cells transfected  
1068 with scramble (si-NC) and siRNA of *SRSF7* respectively. Data are presented as mean  $\pm$  SEM,  
1069 n = 3. \*\*  $P < 0.01$ , \*\*\*  $P < 0.001$ . Two-way ANOVA with Bonferroni's post hoc test. **H.**  
1070 Schematic diagram of mutation of the two m<sup>6</sup>A site in the *PBK* CDS region. **I.** Relative  
1071 mRNA level of *PBK* in U87MG cells transfected with full-length WT or mutant (Mut) *PBK*  
1072 CDS regions for 48 hours. Data are presented as mean  $\pm$  SEM, n = 3. \*\*  $P < 0.01$ . Student's  
1073 two-tailed *t* test. **J.** Relative mRNA levels of *PBK* after actinomycin D treatment at indicated  
1074 time points in U87MG cells transfected with full-length WT or mutant (Mut) *PBK* CDS  
1075 regions respectively. Data are presented as mean  $\pm$  SEM, n = 3. \*\*  $P < 0.01$ , \*\*\*  $P < 0.001$   
1076 Two-way ANOVA with Bonferroni's post hoc test. **K.** Relative mRNA levels of *PBK* after  
1077 actinomycin D treatment at indicated time points in U87MG cells transfected with scramble  
1078 (si-NC) and siRNA of *IGF2BP2* (si-*IGF2BP2*) respectively. Data are presented as mean  $\pm$   
1079 SEM, n = 3. \*\*  $P < 0.01$ , \*\*\*  $P < 0.001$ . Two-way ANOVA with Bonferroni's post hoc test. **L.**  
1080 Relative mRNA levels of *PBK* after actinomycin D treatment at indicated time points in WT  
1081 *PBK* or Mut *PBK* overexpressed U87MG cells transfected with scramble (si-NC) and siRNA  
1082 of *IGF2BP2* respectively. Data are presented as mean  $\pm$  SEM, n = 3. \*\*\*  $P < 0.001$ . Two-way  
1083 ANOVA with Dunnett's post hoc test.

1084 **Figure 7 SRSF7 regulates m<sup>6</sup>A independent of alternative splicing and polyadenylation**

1085 **A.** rMAPS2 generated metagene plot showing the enrichment of SRSF7 iCLIP-seq peaks at  
1086 the regions around corresponding splice sites of the differentially spliced SE events upon

1087 *SRSF7* knockdown. **B.** GO enrichment of differentially spliced genes (all types) upon *SRSF7*  
1088 knockdown. **C.** Venn diagram showing the overlap between differentially spliced genes (all  
1089 types) and genes with *SRSF7* directly regulated m<sup>6</sup>A peaks. **D.** Scatter plot comparing the  
1090 distal poly(A) site usage index (PDUI) between control and *SRSF7* knockdown in U87MG  
1091 cells.  
1092



1093 **Supplementary figure legends**

1094 **Figure S1 Interaction between SRSF7 and methyltransferase complex**

1095 **A.** Western blots showing Flag-tagged SRSF7 interacts with endogenous METTL3,  
1096 METTL14 and WTAP with RNase treatment in 293T cells. **B.** Schematic diagram of the  
1097 truncated regions of *SRSF7*. FL: Full length, RRM: RNA recognition motif, Zn: Zinc knuckle,  
1098 RS: arginine/serine.

1099

1100 **Figure S2 SRSF7 specifically facilitates m<sup>6</sup>A methylation near its binding sites**

1101 **A.** Enriched motifs in m<sup>6</sup>A peaks of control and *SRSF7*-KD U87MG cells. **B.** Normalized  
1102 distributions of m<sup>6</sup>A peaks across 5'UTR, CDS, and 3'UTR of mRNA in U87MG cells  
1103 transfected with scramble (si-NC) and siRNAs of *SRSF7* (si-*SRSF7*) respectively. **C.** Box plot  
1104 comparing the m<sup>6</sup>A ratios of the m<sup>6</sup>A peaks in control and *SRSF7*-KD U87MG cells. **D.**  
1105 Heatmap representing the Z-score transformed m<sup>6</sup>A ratios in si-NC and si-*SRSF7* in U87MG  
1106 cells respectively. **E, F.** GO (E) and KEGG (F) enrichment analyses of genes with  
1107 down-regulated m<sup>6</sup>A peaks upon *SRSF7* knockdown. **G.** Pie chart showing the fractions of  
1108 *SRSF7* iCLIP-seq peaks located in different regions of genes. **H.** Normalized distributions of  
1109 *SRSF7* iCLIP-seq peaks colocalized with m<sup>6</sup>A peaks across 5'UTR, CDS, and 3'UTR of  
1110 mRNA in U87MG cells. **I.** Plot of cumulative fraction of log<sub>2</sub> fold change of m<sup>6</sup>A ratios upon  
1111 *SRSF7* knockdown using si-*SRSF7* for the m<sup>6</sup>A peaks within the orange module and all other  
1112 modules respectively. *P* value of two-tailed Wilcoxon test is indicated.

1113

1114 **Figure S3 SRSF7 regulates gene expression**

1115 **A.** Heatmap representing the Z-score transformed gene expression of differentially expressed  
1116 genes between control and SRSF7-KD U87MG cells. **B, C.** GO enrichment analyses of genes  
1117 with down-regulated (B) and up-regulated (C) gene expression upon *SRSF7* knockdown. **D-F.**  
1118 GSEA plot for the gene expression changes due to *SRSF7* knockdown in U87MG cells.

1119

1120 **Figure S4 SRSF7 directly targets and facilitates the methylation of m<sup>6</sup>A on genes**  
1121 **involved in cell proliferation and migration**

1122 **A.** KEGG enrichment of the corresponding genes with the overlapped m<sup>6</sup>A peaks between  
1123 down-regulated m<sup>6</sup>A peaks upon *SRSF7* knockdown and SRSF7 iCLIP-seq peaks. **B.** GO  
1124 enrichment analysis of genes with SRSF7 iCLIP-seq peaks not colocalize with m<sup>6</sup>A peaks. **C.**  
1125 Tracks displaying the read coverage of IPs and inputs of m<sup>6</sup>A-seq as well as the SRSF7  
1126 iCLIP-seq on *ROBO1*. The SRSF7 directly regulated m<sup>6</sup>A peak is highlighted.

1127

1128 **Figure S5 SRSF7 promotes the migration and proliferation of GBM cells**

1129 **A.** Representative images of colony formation assay in U87MG and LN229 cells  
1130 overexpressed SRSF7. **B.** Western blot showing efficiently knockdown of SRSF7 in U87MG  
1131 and LN229 cells transduced with control shRNA or *SRSF7* shRNA respectively. **C.**  
1132 Representative images of transwell migration assay in U87MG and LN229 cells transduced  
1133 with control shRNA or *SRSF7* shRNA respectively, Scar bars: 50  $\mu$ m. **D.** Representative  
1134 images of EdU staining assays and bar plot comparing the EdU positive rates in U87MG and  
1135 LN229 cells transduced with control shRNA or *SRSF7* shRNA respectively. Data are  
1136 presented as mean  $\pm$  SEM, n = 5. \*\*\*  $P < 0.001$ . One-way ANOVA with Dunnett's post hoc  
1137 test. Scar bars: 50  $\mu$ m. **E.** Western blot showing the protein level of SRSF7 in U87MG and

1138 LN229 cells transduced with sh*SRSF7* together with empty vector and *SRSF7* with  
1139 synonymous mutations. **F.** Representative images of colony formation assay in U87MG and  
1140 LN229 cells with control, *SRSF7* knockdown, and *SRSF7* knockdown rescued by *SRSF7*  
1141 overexpression. **G.** Representative images of EdU staining assays and bar plot comparing the  
1142 EdU positive rates in U87MG and LN229 cells with control, *SRSF7* knockdown, and *SRSF7*  
1143 knockdown rescued by *SRSF7* overexpressed. Data are presented as mean  $\pm$  SEM, n = 5. \*  $P$   
1144 < 0.05, \*\*  $P$  < 0.01, \*\*\*  $P$  < 0.001. One-way ANOVA with Tukey's post hoc test. Scar bars:  
1145 50  $\mu$ m. **H.** Sphere formation results in U87MG cells upon *SRSF7* depletion and  
1146 overexpressed. Scar bars: 100  $\mu$ m.

1147

1148 **Figure S6 SRSF7 promotes the proliferation and migration of glioblastoma cells**  
1149 **partially dependent on METTL3**

1150 **A, B.** Gene expression change of *METTL3*, *METTL14*, and *WTAP* in U87MG cells (A) and (B)  
1151 transfected with scramble (si-NC) and siRNA of *SRSF7* (si-*SRSF7*-1, si-*SRSF7*-2 and  
1152 si-*SRSF7*-3) respectively. Data are presented as mean  $\pm$  SEM, n = 3. \*\*\*  $P$  < 0.001. ns: no  
1153 significant difference. One-way ANOVA with Dunnett's post hoc test. **C-E.** Western blot  
1154 showing the protein level of *METTL3*, *METTL14*, *WTAP*, and *SRSF7* upon *SRSF7*  
1155 knockdown (C-D) or *SRSF7* overexpression (E) in U87MG and LN229 cells. **F.** Western blot  
1156 showing the protein level of *METTL3* and *SRSF7* in U87MG cells transfected with si-NC and  
1157 si-*METTL3*. **G.** Western blot showing the protein level of *WTAP* and *SRSF7* in U87MG cells  
1158 transfected with si-NC and si-*WTAP*. **H-J.** 3D-SIM imaging of colocalization of *METTL3*  
1159 (H), *METTL14* (I), and *WTAP* (J) with the nuclear speckle marker SC35. Scale Bar: 2  $\mu$ m.

1160

1161 **Figure S7 SRSF7 promotes the proliferation and migration of GBM cells partially**  
1162 **through increasing the stability of *PBK* mRNA**

1163 **A.** Kaplan-Meier survival analysis based on *PBK* expression in GBM patients from CGGA  
1164 dataset. **B.** Relative mRNA expression level of *PBK* in GBM patients from CGGA dataset. **C.**  
1165 Scatter plot showing the correlation between *METTL3* and *PBK* gene expression across GBM  
1166 patients from CGGA dataset, the *P* value and correlation coefficient are indicated. **D.** Western  
1167 blot showing the protein level of PBK and SRSF7 in U87MG and LN229 cells upon *SRSF7*  
1168 knockdown and rescued by co-transducing full-length WT *PBK* CDS regions. **E.** Colony  
1169 formation results in U87MG and LN229 cells upon *SRSF7* knockdown and rescued by  
1170 co-transducing full-length WT *PBK* CDS regions. **F, G.** Bar plot showing the relative mRNA  
1171 level of *SRSF7* (F) and *METTL3* (G) in *SRSF7* overexpressed U87MG cells transfected  
1172 without or with si-*METTL3*-1 as indicated. Data are presented as mean  $\pm$  SEM,  $n = 3$ . \*\*\*  $P <$   
1173 0.001. One-way ANOVA with Tukey's post hoc test. **H.** Relative mRNA expression level of  
1174 *PBK* in U87MG cells transfected with scramble (si-NC) and siRNA of *IGF2BP2*  
1175 (si-*IGF2BP2*-1, si-*IGF2BP2*-2) respectively. Data are presented as mean  $\pm$  SEM,  $n = 3$ . \*\*  $P$   
1176  $< 0.01$ , \*\*\*  $P < 0.001$ . One-way ANOVA with Dunnett's post hoc test. **I.** Scatter plot showing  
1177 the correlation between *IGF2BP2* and *PBK* gene expression across GBM patients from  
1178 CGGA dataset, the *P* value and correlation coefficient are indicated.

1179

1180 **Figure S8: Motif analyses of up-regulated m<sup>6</sup>A peaks and SRSF7 iCLIP-seq peaks that**  
1181 **affect m<sup>6</sup>A**

1182 **A.** Motifs enriched in the up-regulated m<sup>6</sup>A peaks using all m<sup>6</sup>A peaks as background. **B.**  
1183 Motifs enriched in the SRSF7 iCLIP-seq peaks that affect m<sup>6</sup>A using all iCLIP-seq peaks as  
1184 background.

1185

1186 **Figure S9: Scatter plot showing the correlation coefficients (r) and  $-\log_{10}P$  value of the**  
1187 **gene expression between *SRSF7* and *METTL3* in multiple cancers of TCGA dataset**

1188

1189 **Figure S10: Boxplots comparing the gene expression of *SRSF7* in cancer (red) and**  
1190 **normal (grey) for multiple cancers of TCGA dataset. \*:  $P < 0.01$ .**

1191

1192 **Figure S11: Boxplots comparing the gene expression of *PBK* in cancer (red) and normal**  
1193 **(grey) for multiple cancers of TCGA dataset. \*:  $P < 0.01$**

1194

1195 **Table S1: Information of *SRSF7* iCLIP-seq peaks in U87MG cells**

1196

1197 **Table S2: Information of *SRSF7* directly regulated m6A peaks**

1198

1199 **Table S3: Sequences of primers, siRNAs and shRNA**

1200

1201 **Figure 1**

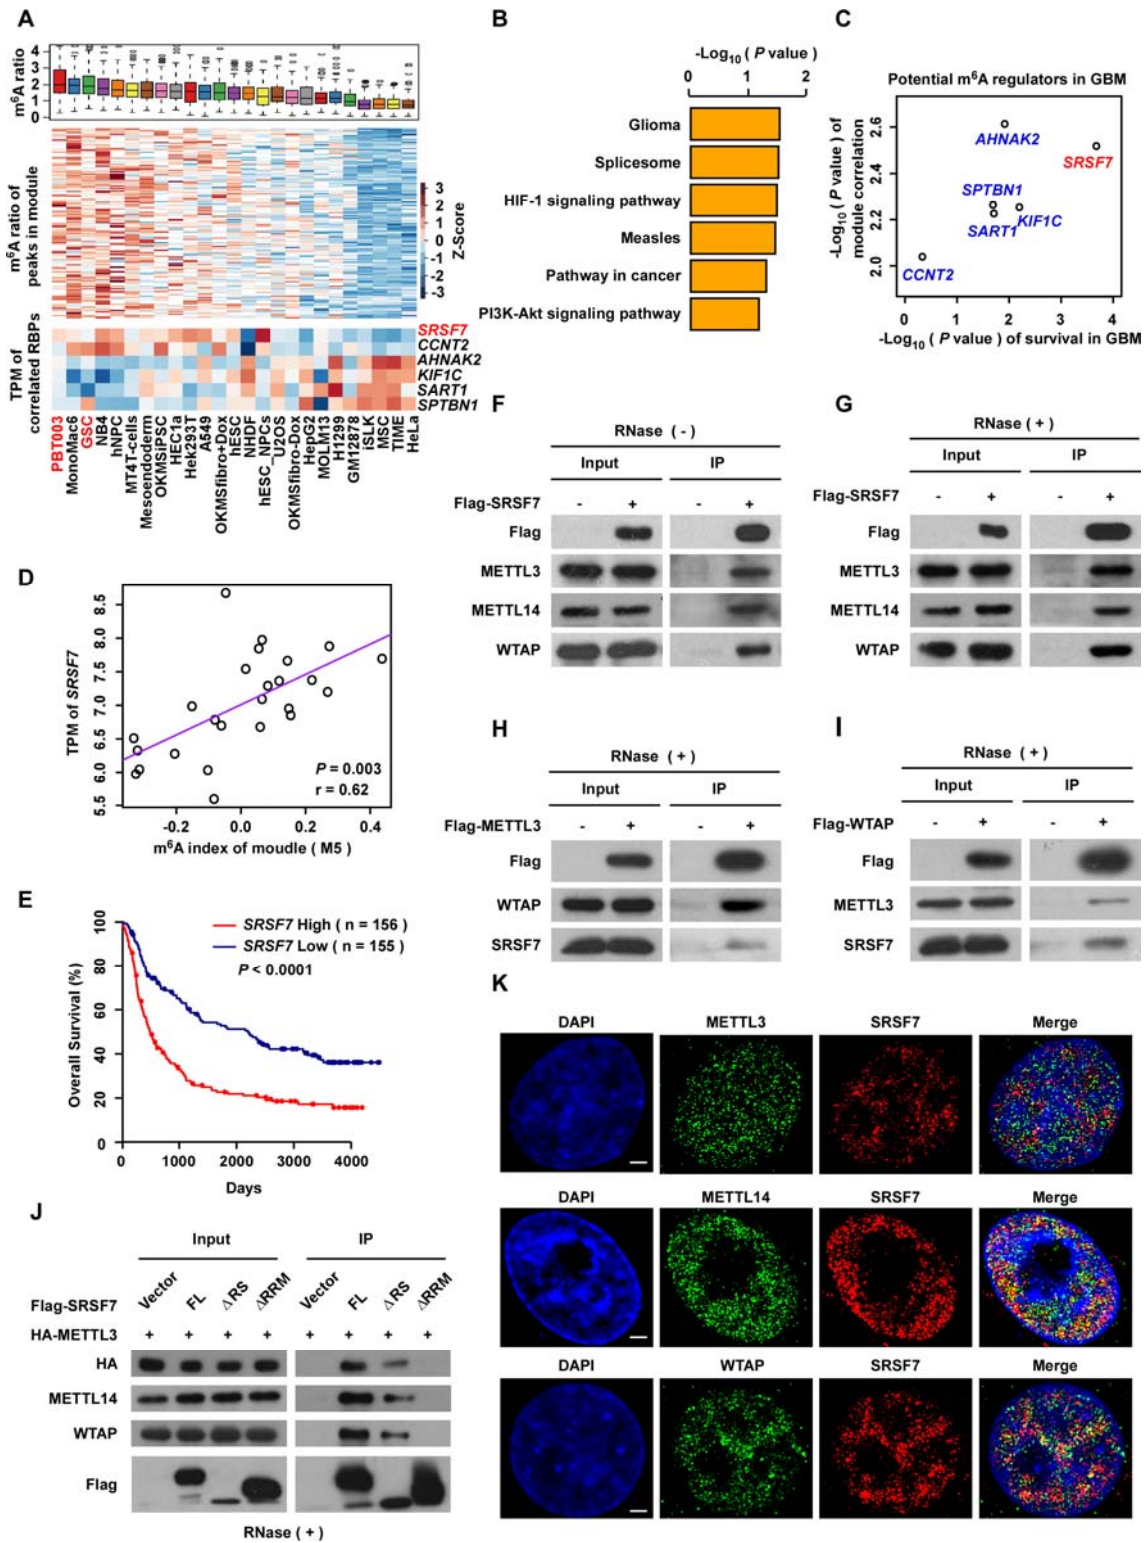

1202

1203

1204 **Figure 2**

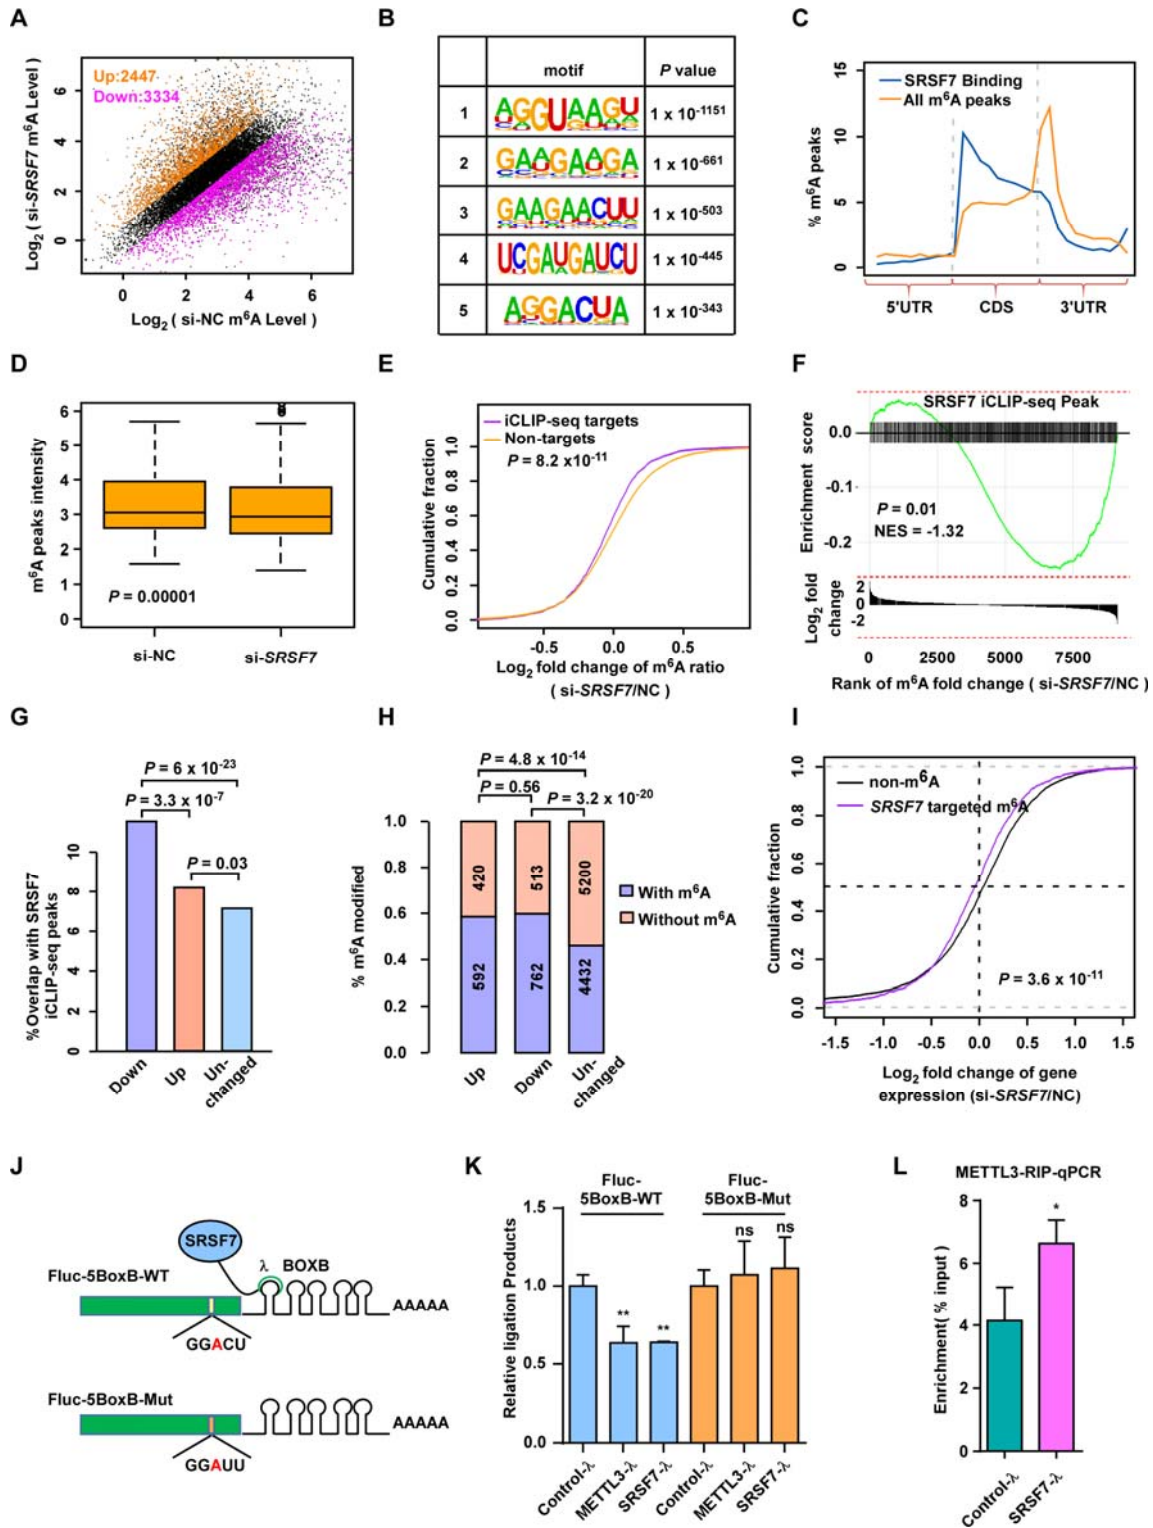

1205

1206

1207

1208 **Figure 3**

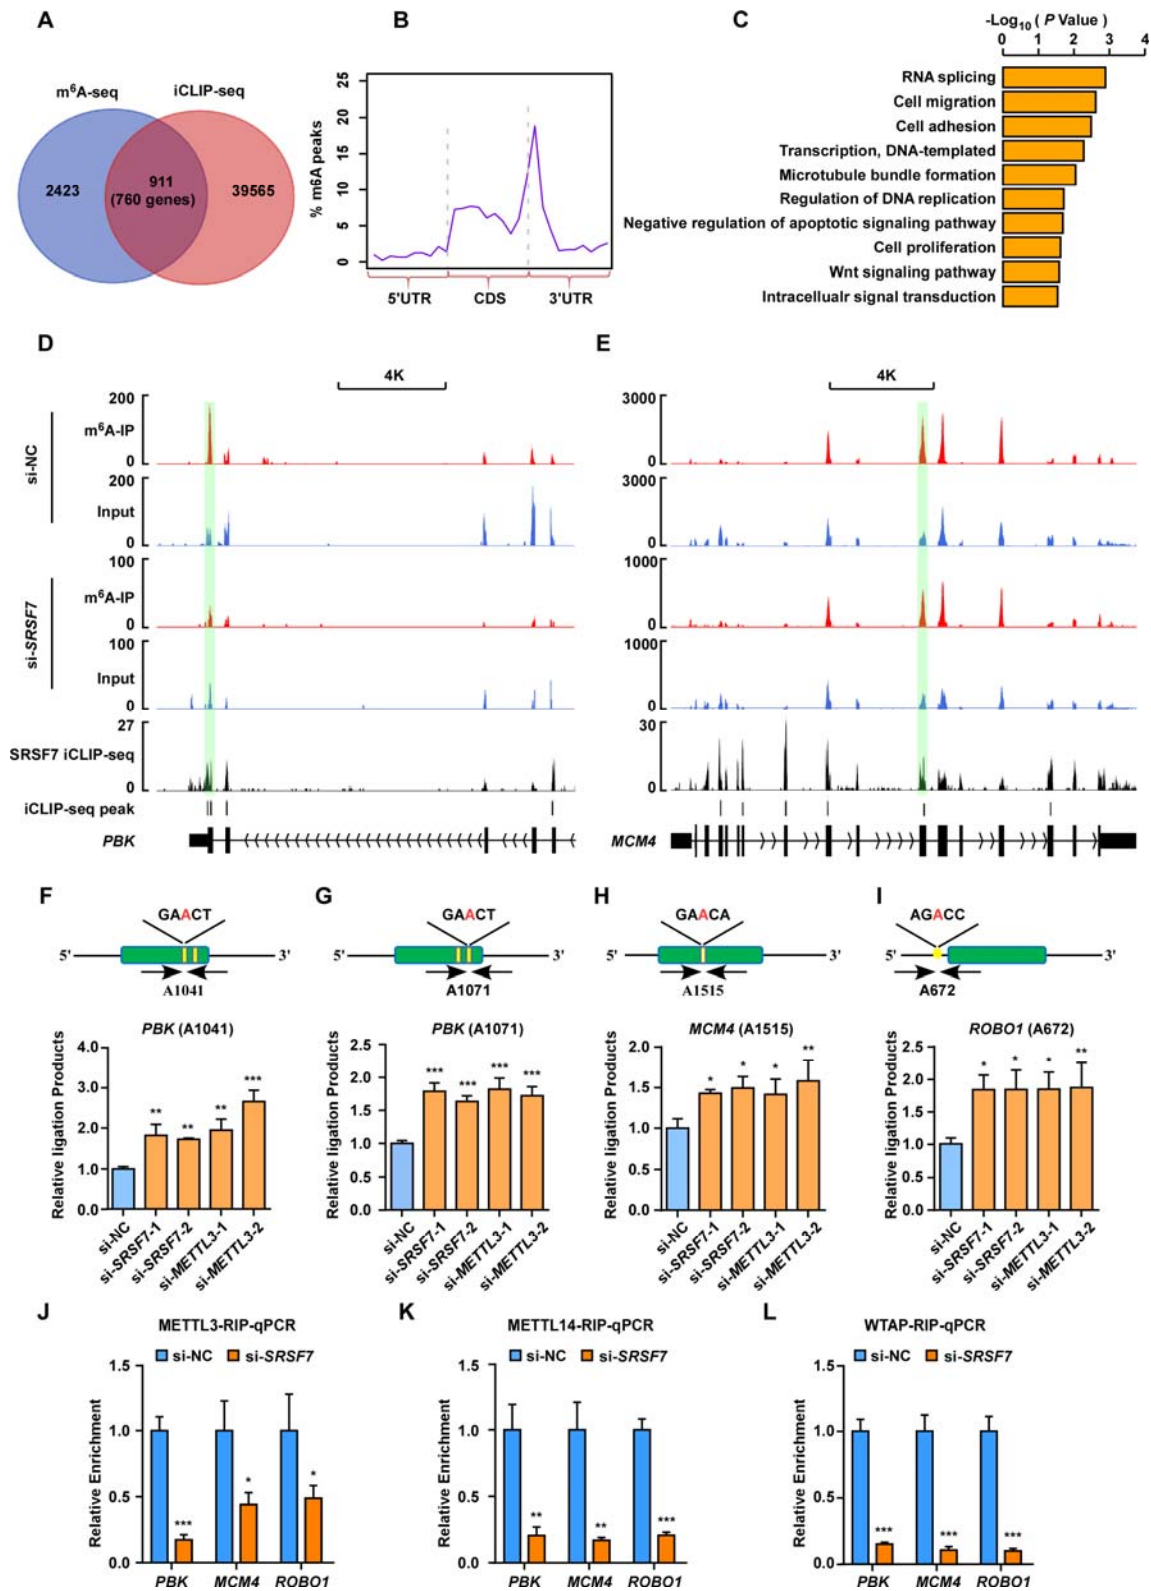

1209

1210



1211 **Figure 4**

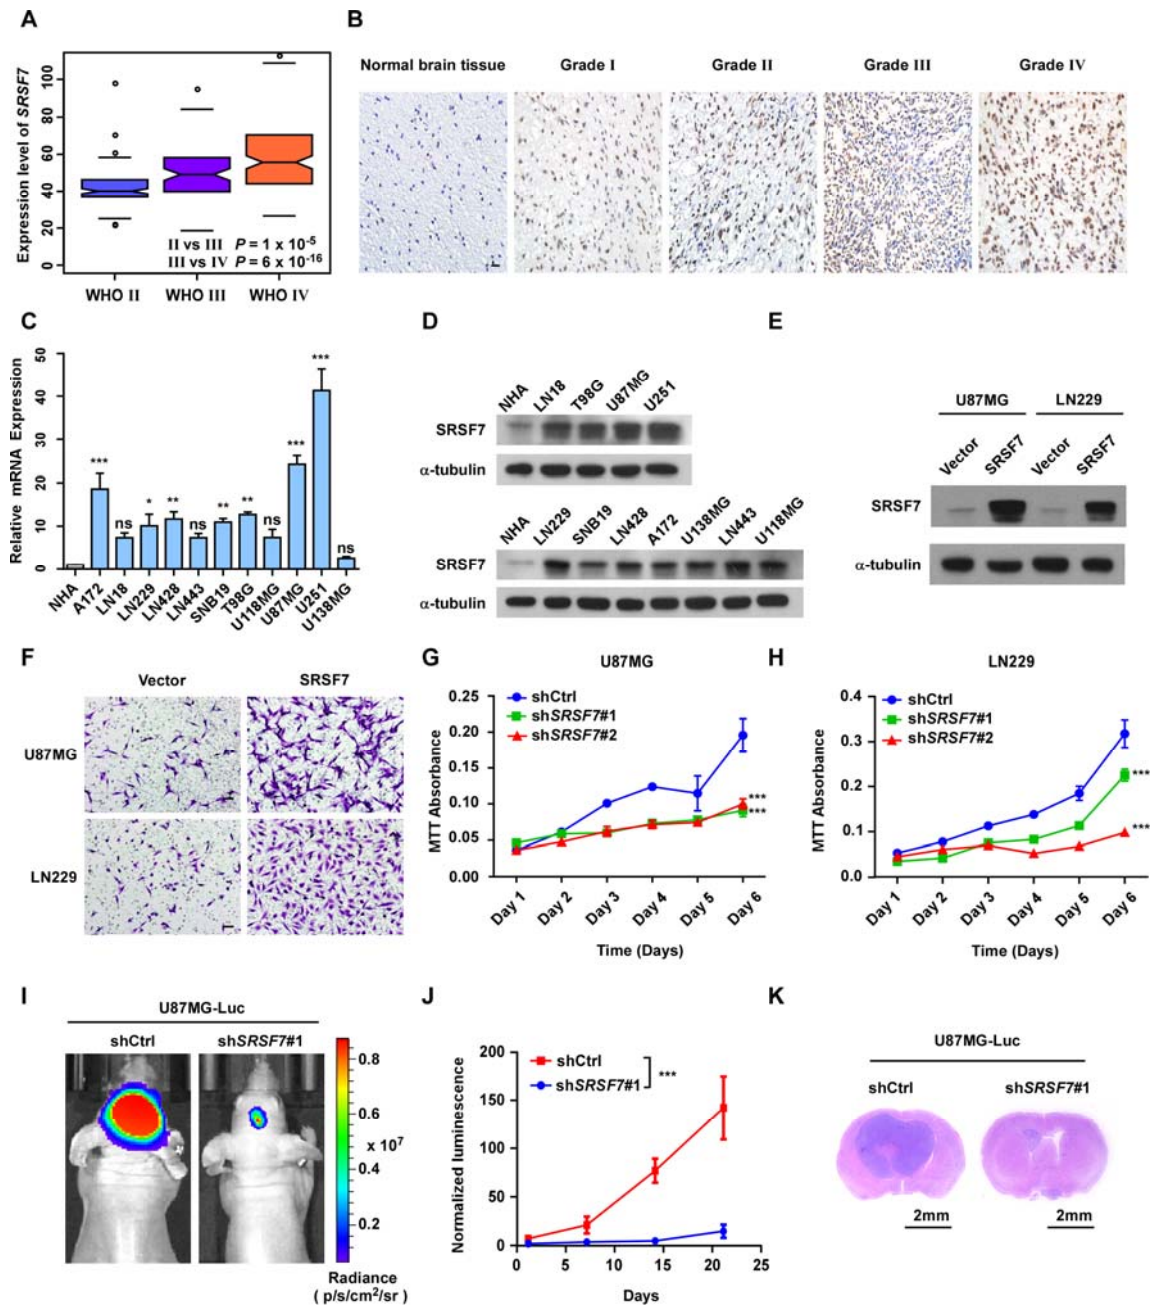

1212

1213

1214 **Figure 5**

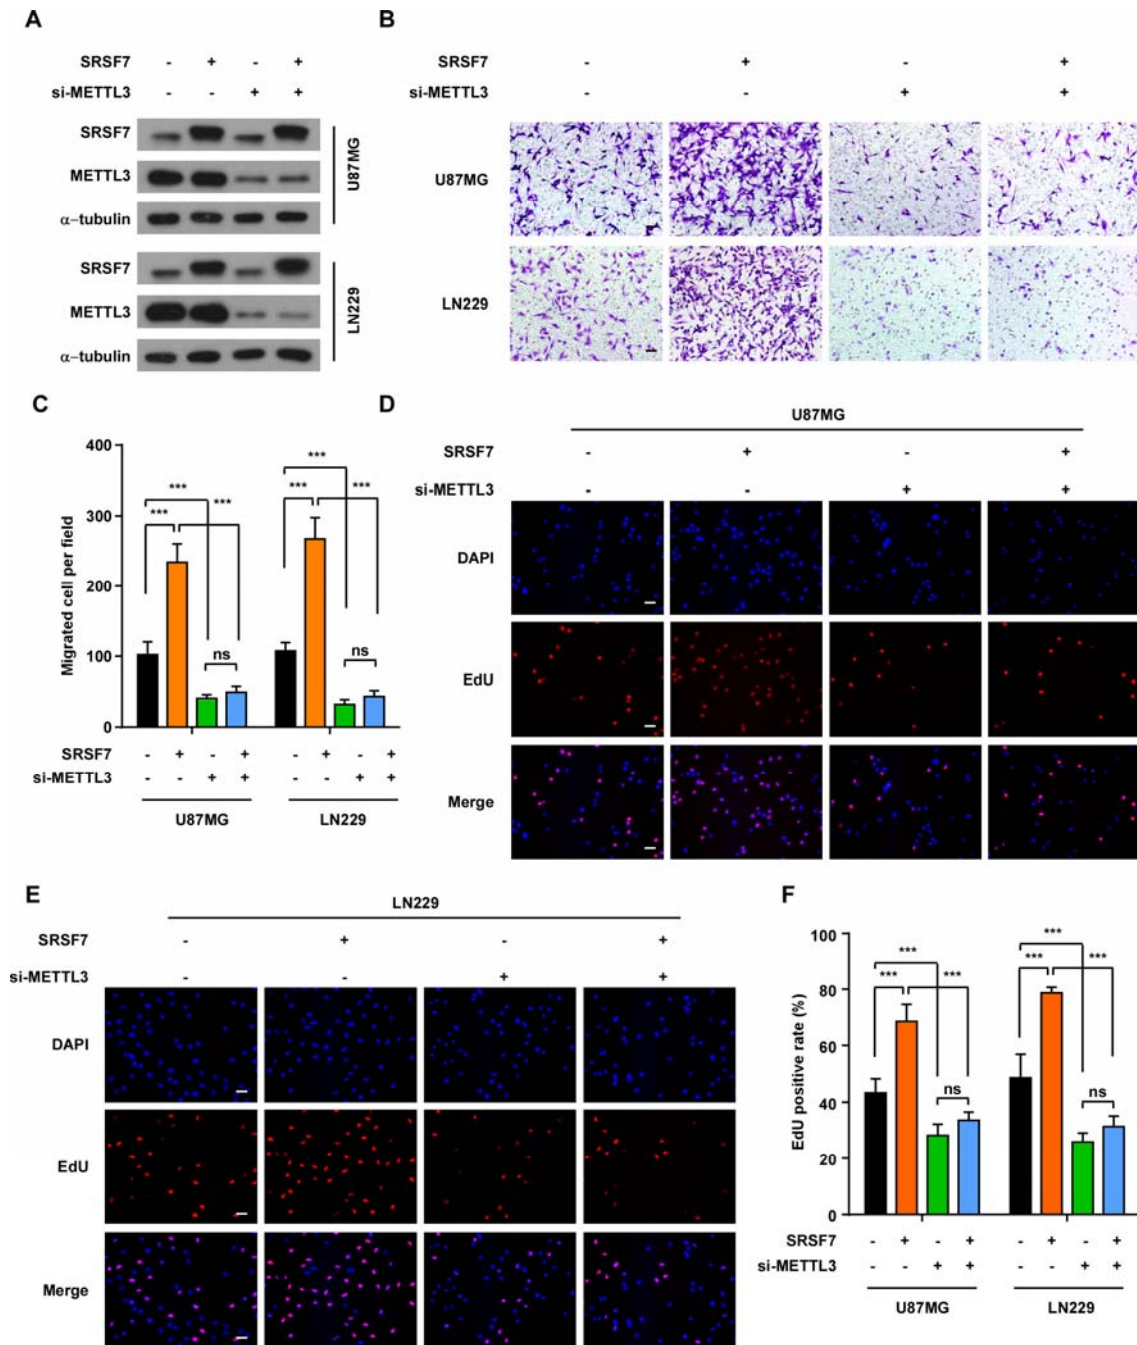

1215

1216

1217 **Figure 6**

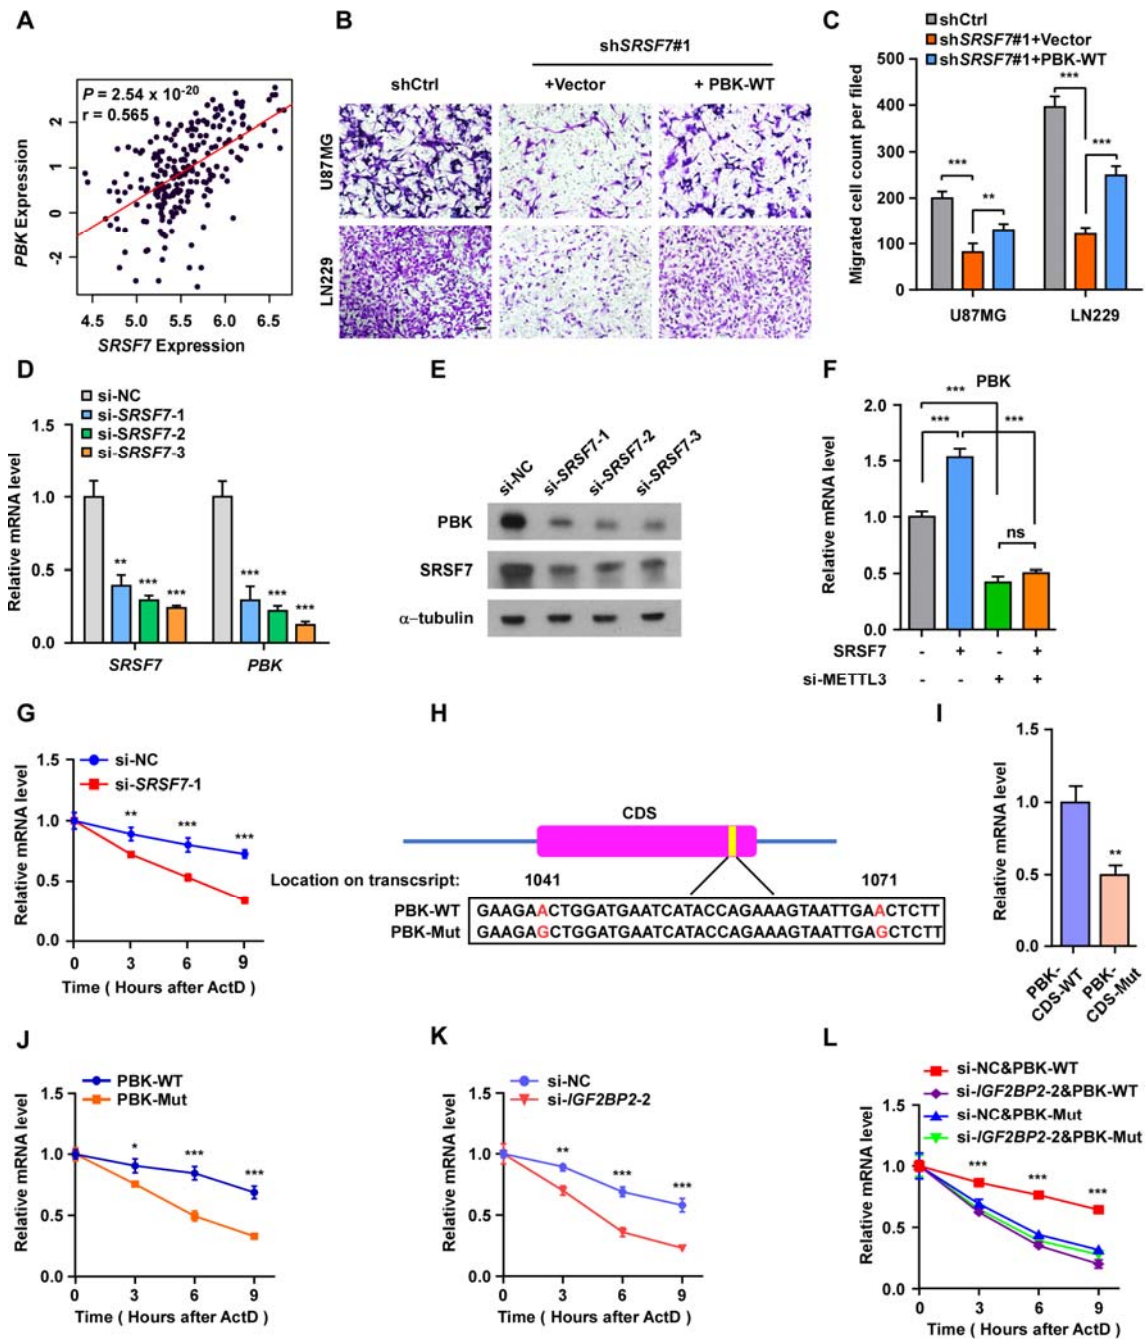

1218

1219

1220 **Figure 7**

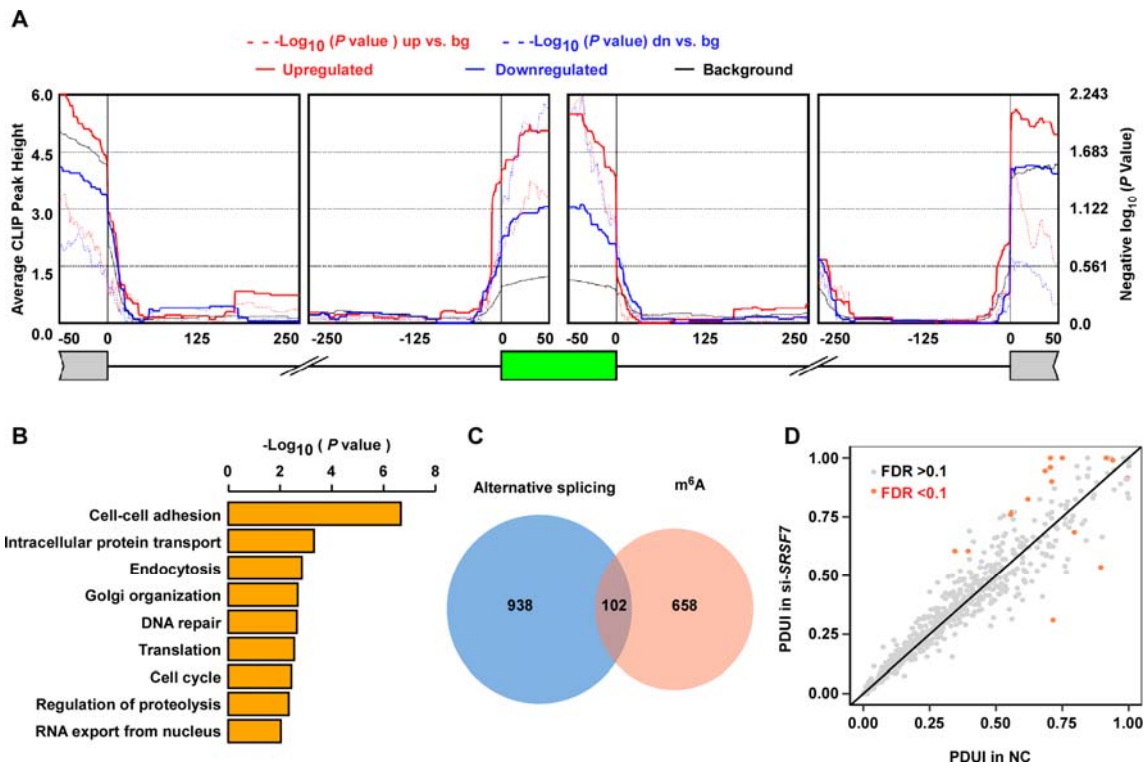

1221
